# Supplementary material for: Turning the tide: comparison of tidal flow by periodic sea level fluctuation and by periodic bed tilting in scaled landscape experiments of estuaries
Source: Copernicus journal article supplement (doi:10.5194/esurf-5-731-2017), 2017-11-28
Supplement: Supplementary file 1 [file actuatorsupport140712-2500.pdf › actuatorsupport140712-2500.pdf]

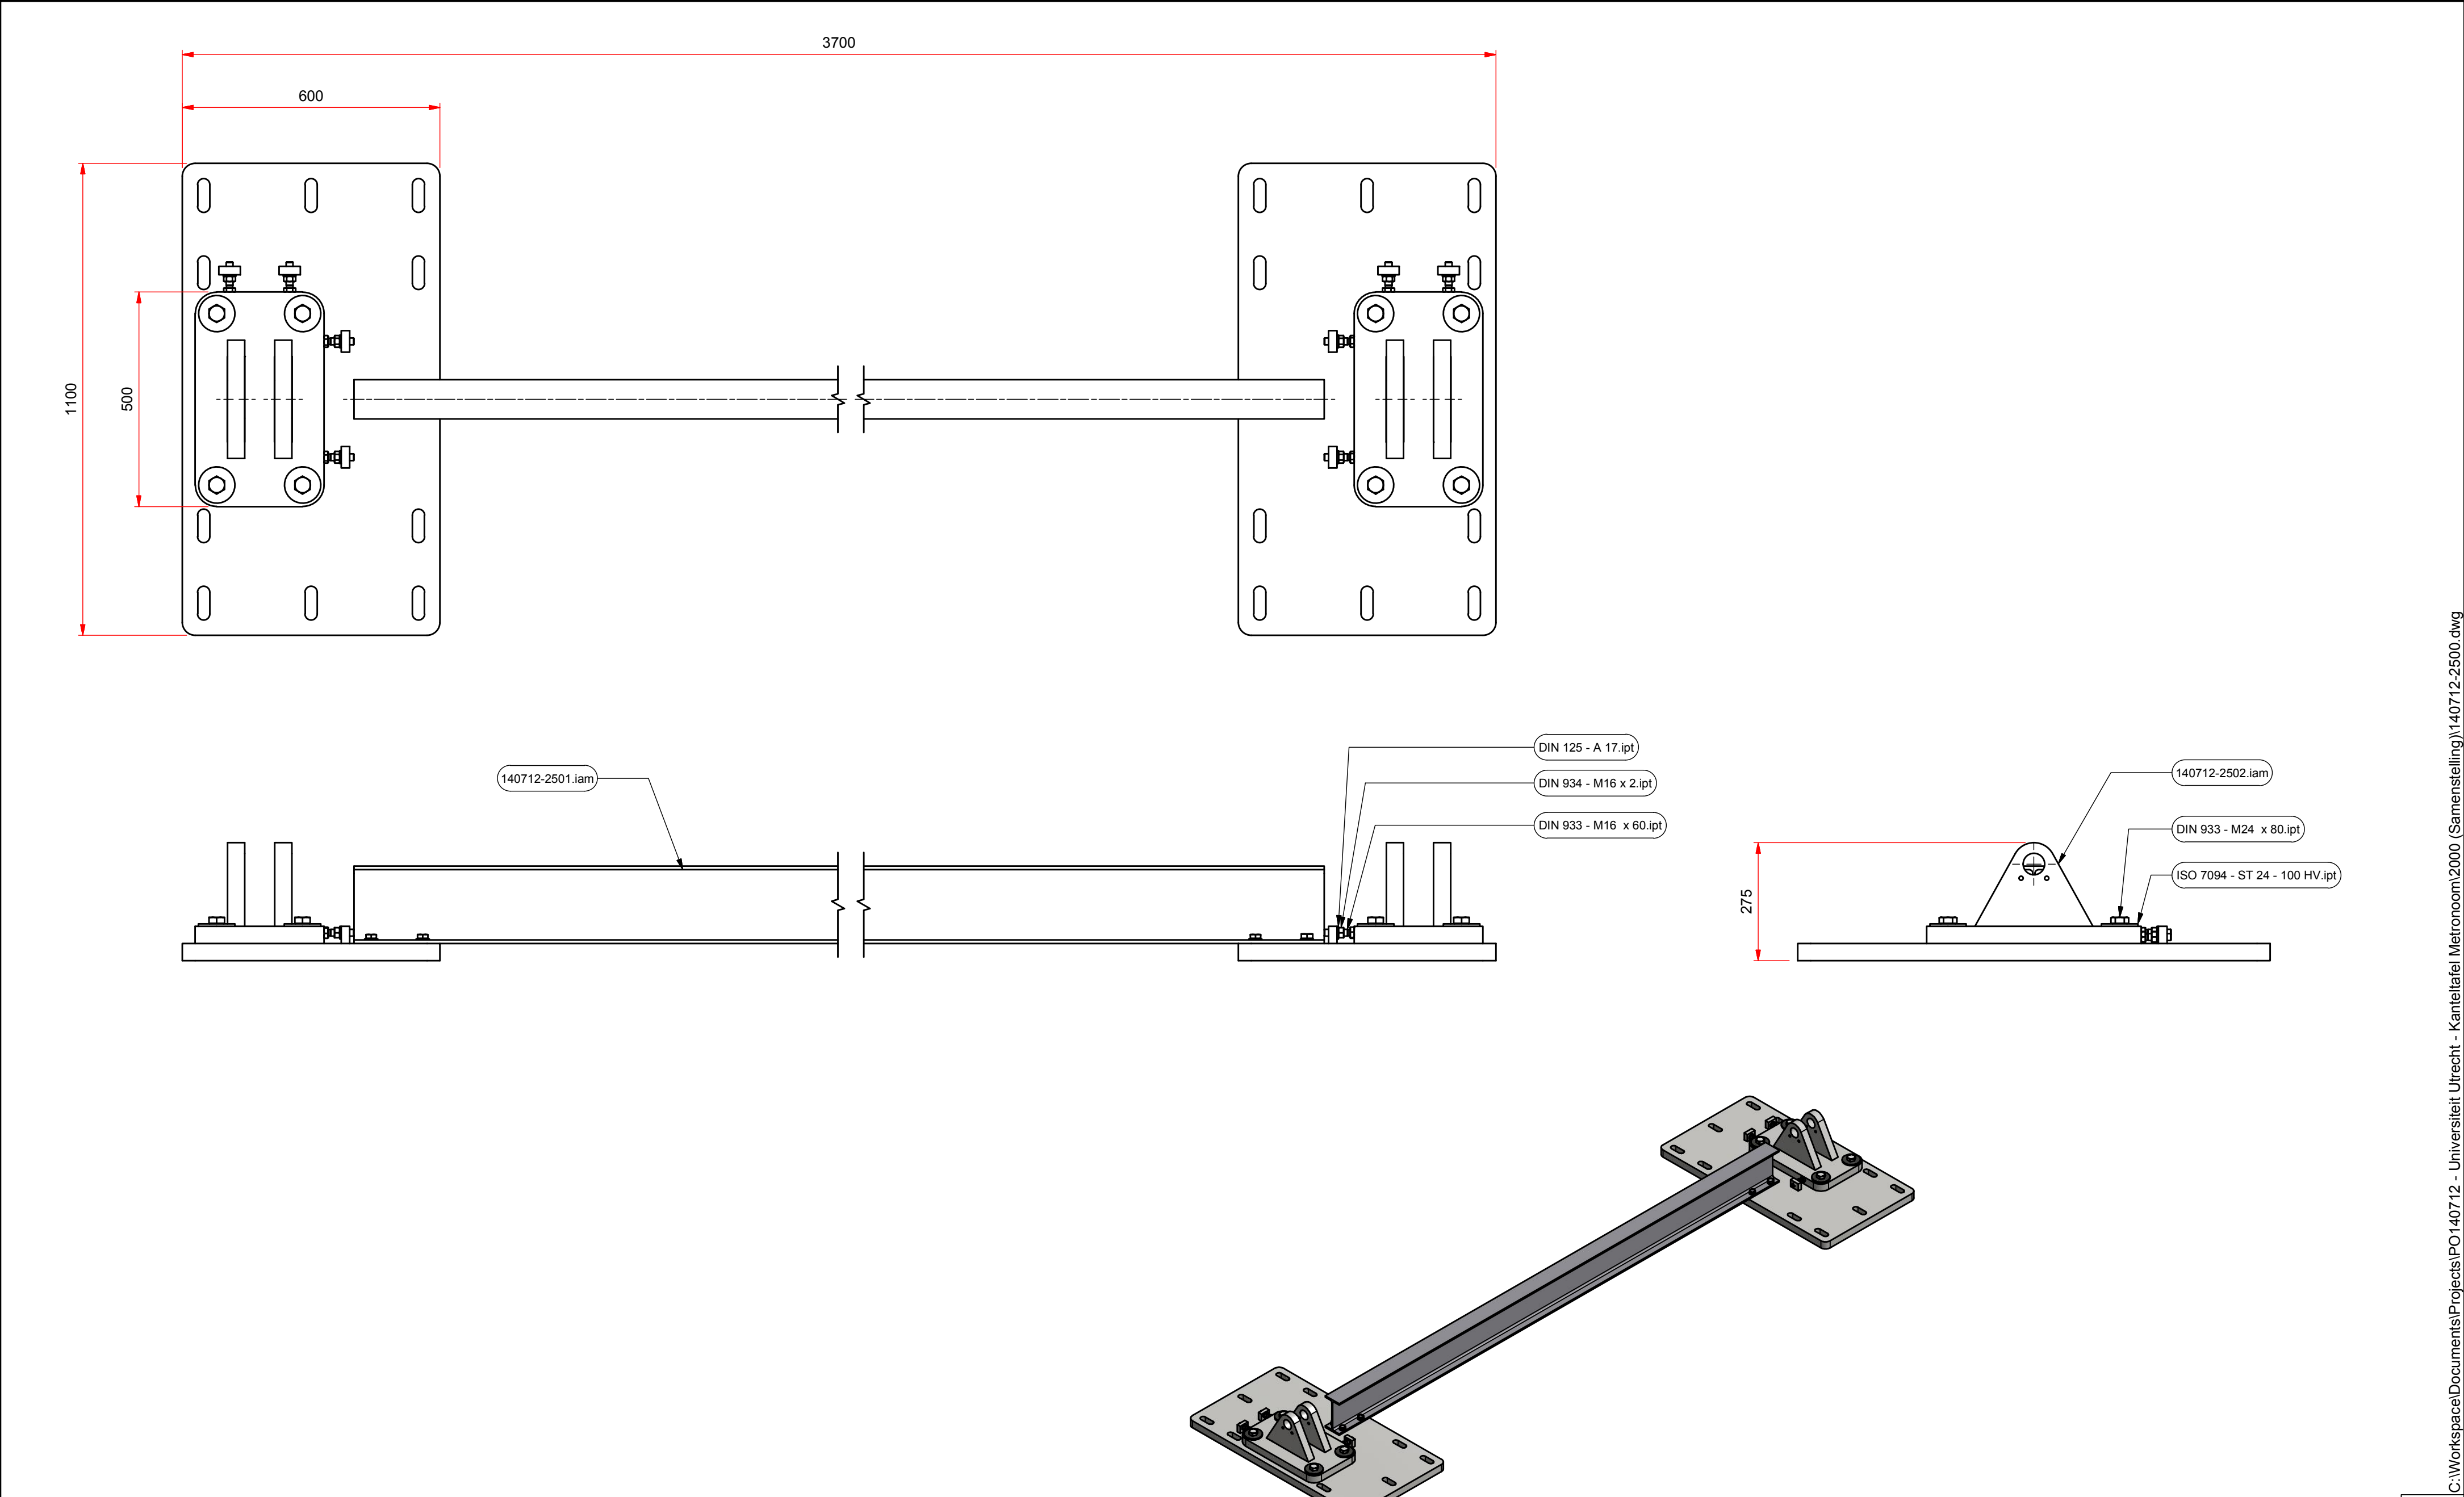

| Zaag lijst                    |        |                                        |               |             |   |   |           |                   |           |
|-------------------------------|--------|----------------------------------------|---------------|-------------|---|---|-----------|-------------------|-----------|
| Nummer                        | Aantal | Omschrijving                           | Afmeting (mm) | Lengte (mm) | A | B | Materiaal | Oppervlak         | Bewerking |
| 140712-2501.iam               | 1      | Afsteunpunt actuator las samenstelling | -             |             |   |   |           | Stralen - Spuiten |           |
| 140712-2502.iam               | 2      | Montage oog las samenstelling          | -             |             |   |   |           | Stralen - Spuiten |           |
| DIN 125 - A 17.ipt            | 8      |                                        |               |             |   |   | Steel     |                   |           |
| DIN 933 - M16 x 60.ipt        | 8      |                                        |               |             |   |   | Steel     |                   |           |
| DIN 933 - M24 x 80.ipt        | 8      |                                        |               |             |   |   | Steel     |                   |           |
| DIN 934 - M16 x 2.ipt         | 8      |                                        |               |             |   |   | Steel     |                   |           |
| ISO 7094 - ST 24 - 100 HV.ipt | 8      |                                        |               |             |   |   | Steel     |                   |           |

|                                                                                                                                                                                                                     |  |                                       |                                                     |                                                  |                                                                                                   |
|---------------------------------------------------------------------------------------------------------------------------------------------------------------------------------------------------------------------|--|---------------------------------------|-----------------------------------------------------|--------------------------------------------------|---------------------------------------------------------------------------------------------------|
| Roughness: ACC. ISO 1302                                                                                                                                                                                            |  | Machining tolerances: ACC. ISO2768-mK |                                                     | Dimension tolerance: ACC. EN ISO 13920 (Class B) |                                                                                                   |
| Company name : Universiteit Utrecht                                                                                                                                                                                 |  |                                       | Drawn : RB                                          |                                                  | Format : A2                                                                                       |
| Project : PO140712                                                                                                                                                                                                  |  |                                       | Date : 15-10-2014                                   |                                                  | Sheet: 1 / 1                                                                                      |
| Description : Vloer afsteunpunt actuator compleet                                                                                                                                                                   |  |                                       | Weight: N/A                                         |                                                  | Projection:  |
| <br><b>Consmema</b><br>Hatterm<br><small>3e Industrieweg 7 8051 CL Hatterm Nederland Tel 038 444 2855 Fax 038 444 5053</small> |  |                                       | Scale: 1 : 10                                       |                                                  | Released                                                                                          |
|                                                                                                                                                                                                                     |  |                                       | Drawing No : 140712-2500.iam<br><br>140712-2500.iam |                                                  |                                                                                                   |
