# Supplementary material for: Turning the tide: comparison of tidal flow by periodic sea level fluctuation and by periodic bed tilting in scaled landscape experiments of estuaries
Source: Copernicus journal article supplement (doi:10.5194/esurf-5-731-2017), 2017-11-28
Supplement: Supplementary file 2 [file centralsupport140712-2300.pdf › centralsupport140712-2300.pdf]

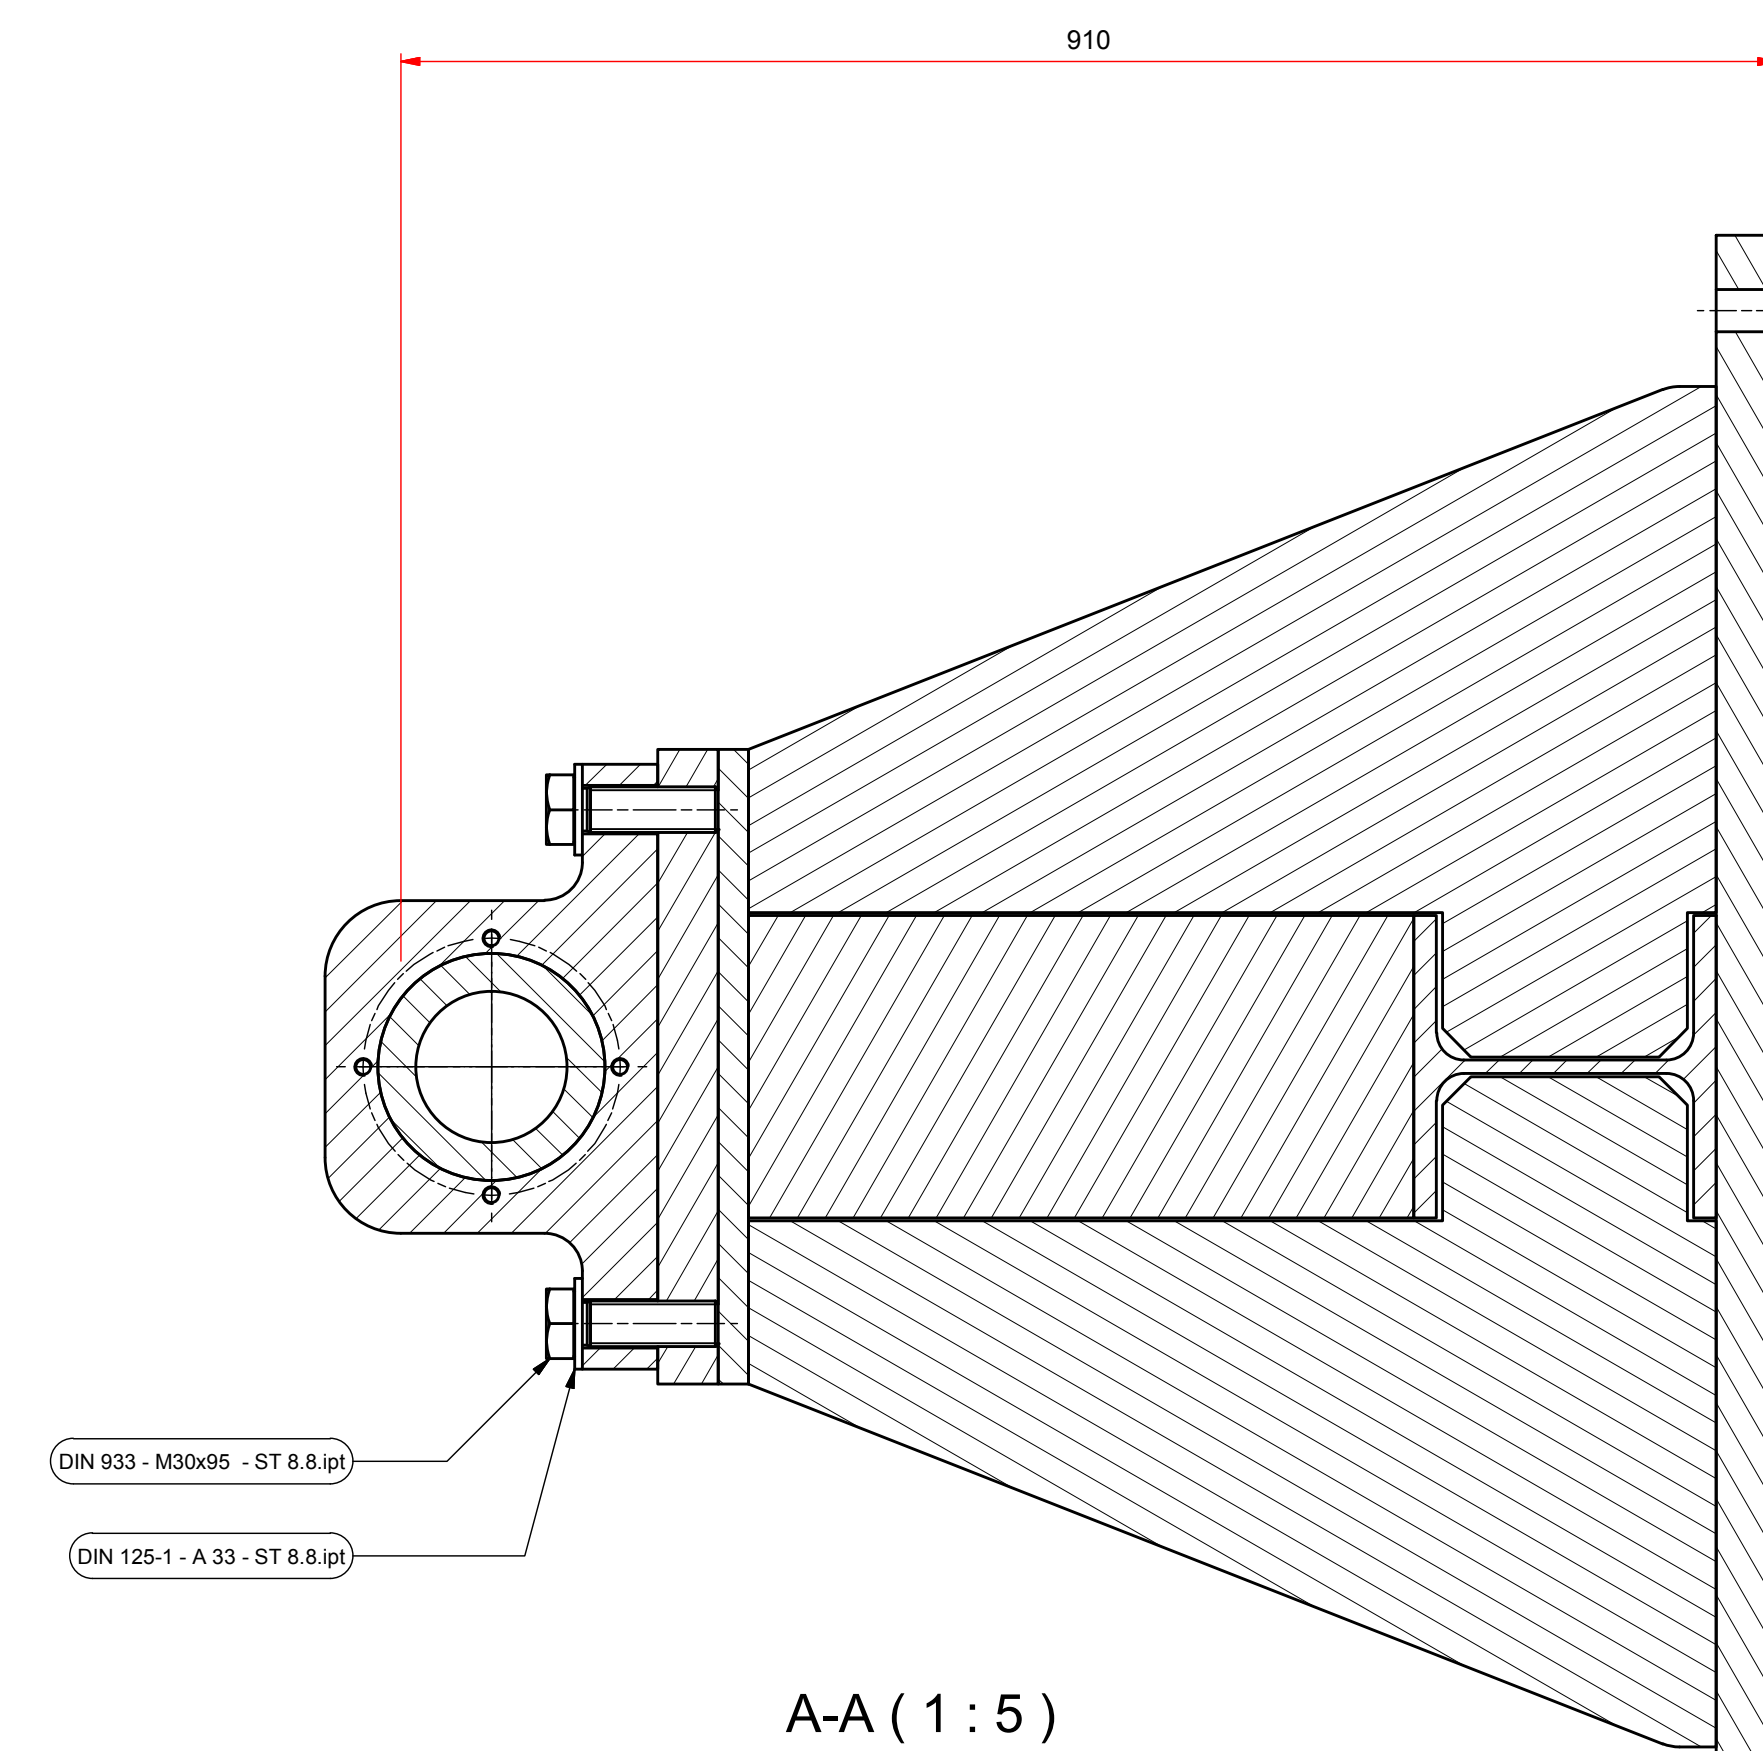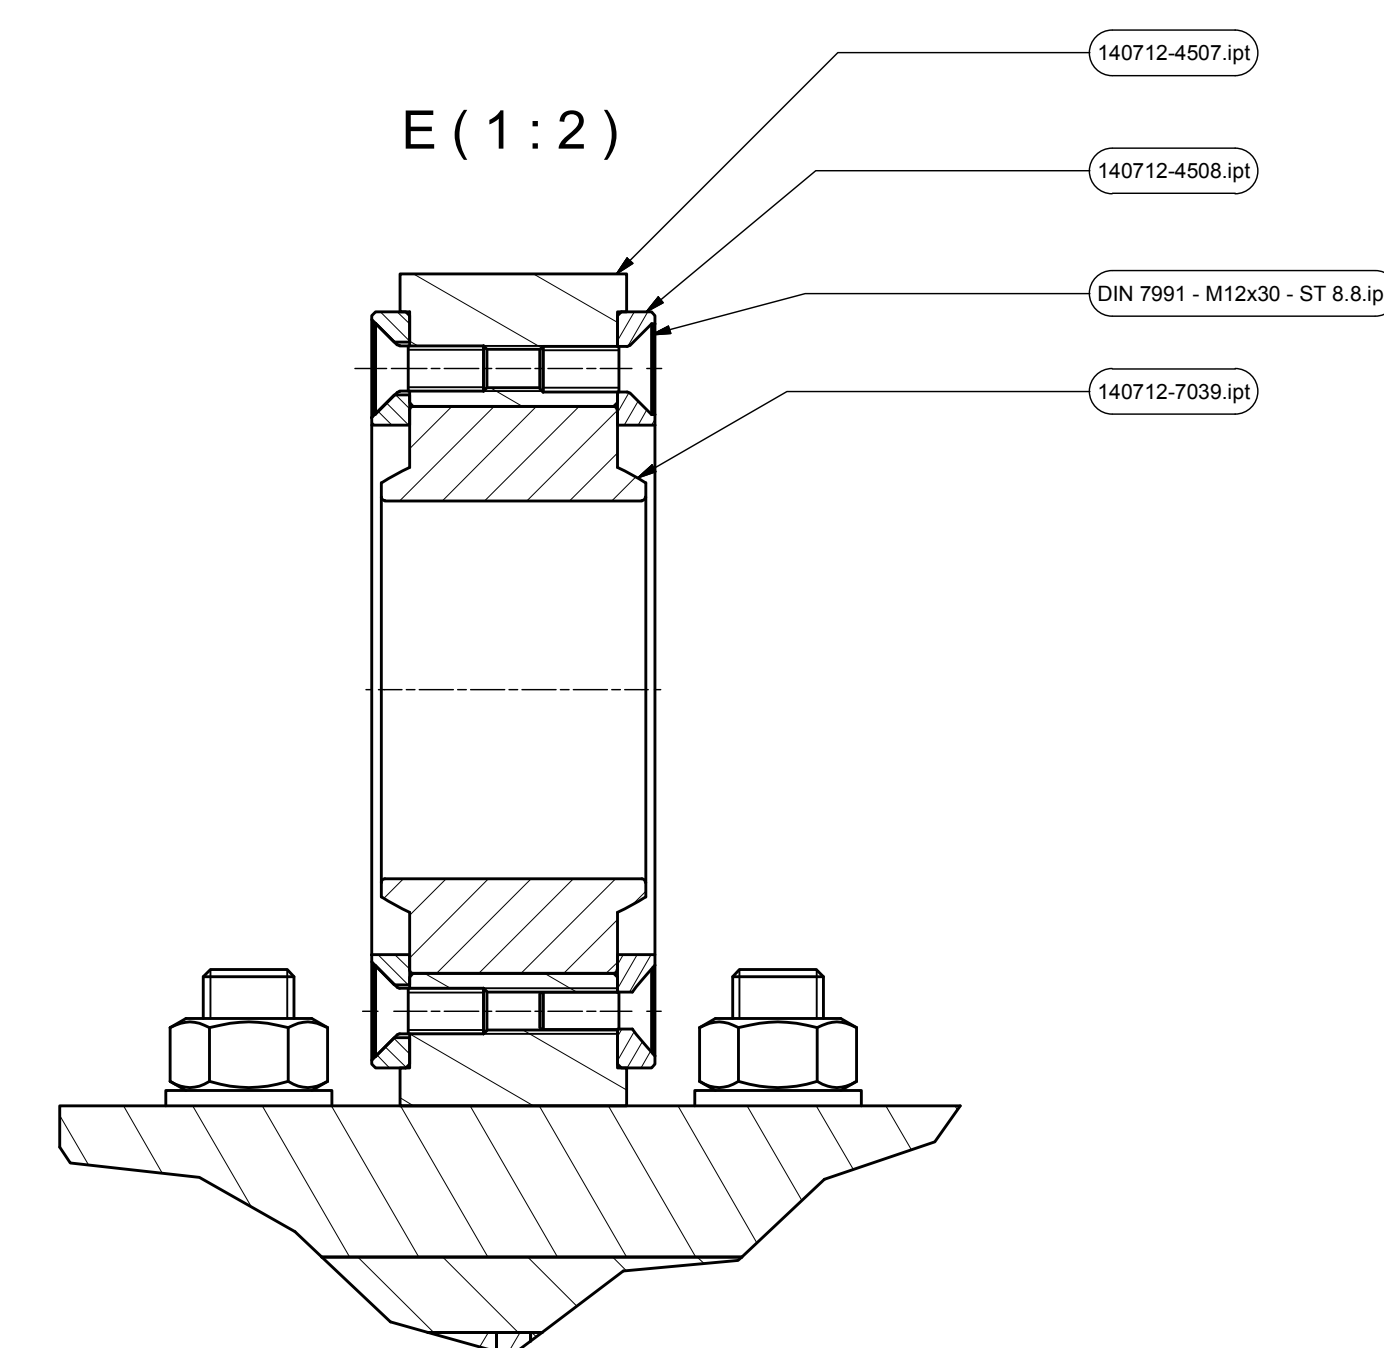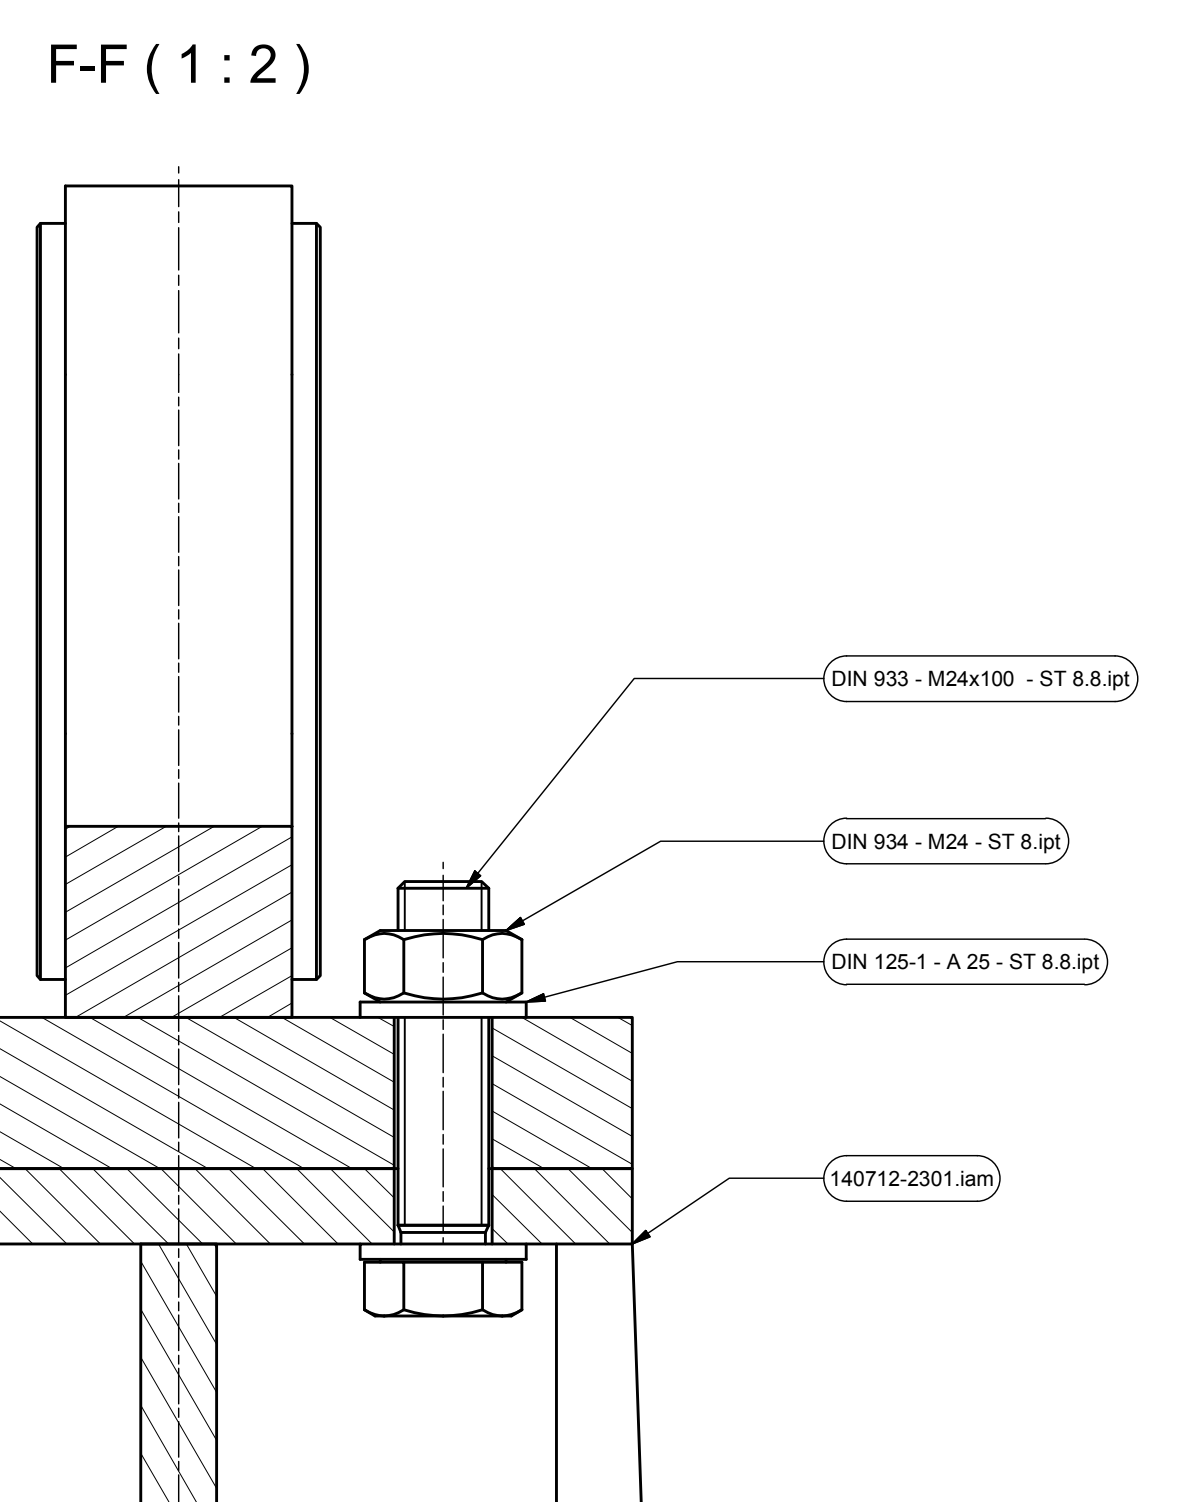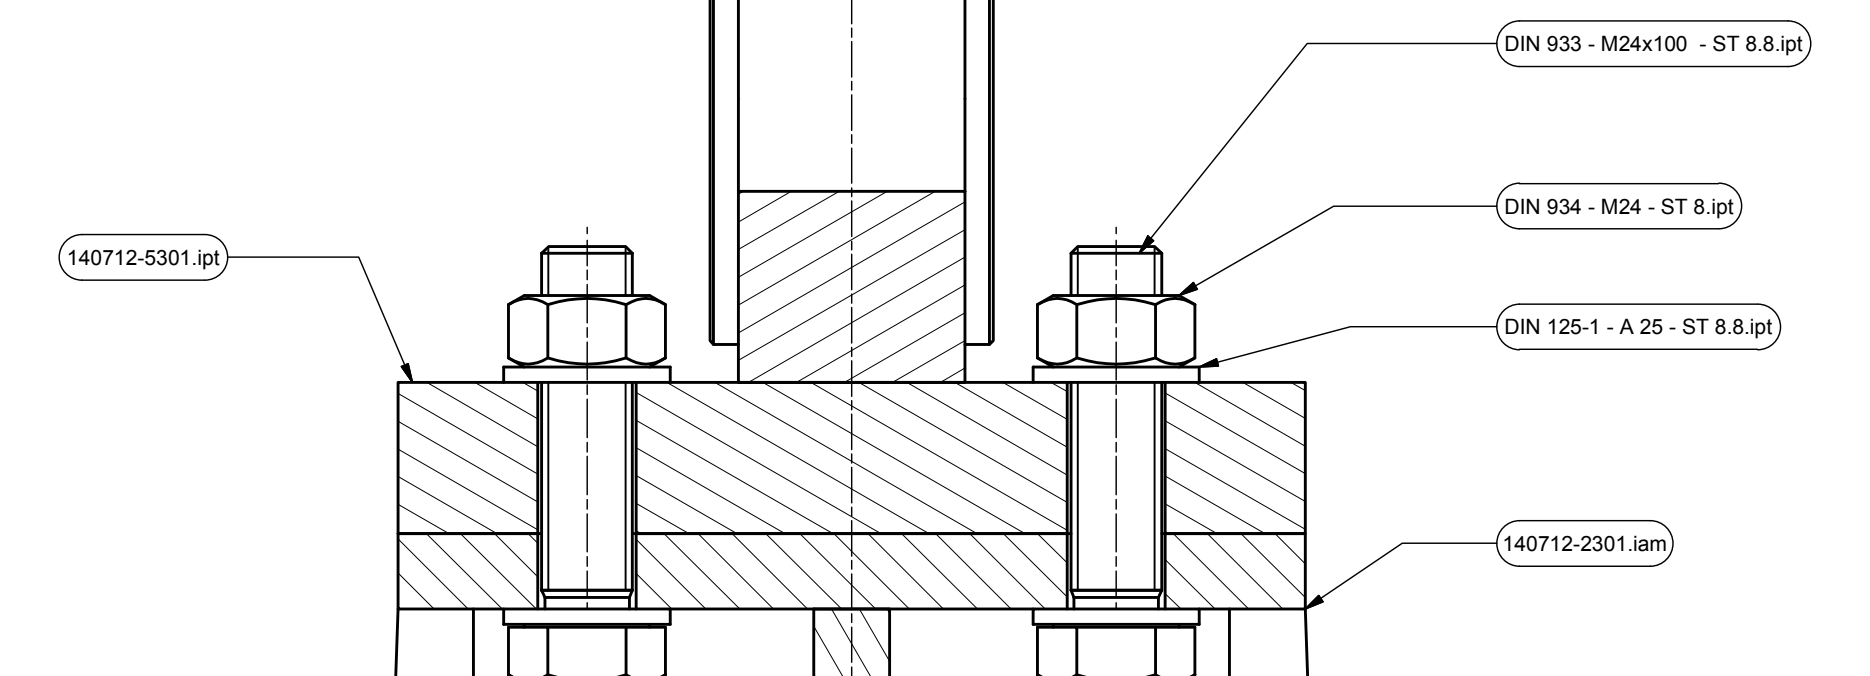

|                                                                                       |                                                                           |                                                            |
|---------------------------------------------------------------------------------------|---------------------------------------------------------------------------|------------------------------------------------------------|
| Page: 1                                                                               |                                                                           |                                                            |
| Register:<br>ACC: ISO 1382                                                            | Matching identifier:<br>ACC: ISO788-ink                                   | Interconnection identifier:<br>ACC: EN ISO 13823 (Class B) |
| Company name:<br>Universiteit Utrecht                                                 | Domain:<br>RS                                                             | Format:<br>A0                                              |
| Project:<br>PO140712                                                                  | Date:<br>16-10-2014                                                       | Sheet:<br>1 / 1                                            |
| Description:<br>Middenbalk complete                                                   | Weight:<br>N/A                                                            | Protection:<br>Released                                    |
|  | Drawing no.:<br>1: 10                                                     | Rev.:<br>1                                                 |
|                                                                                       | 140712-2300.iam                                                           |                                                            |
|                                                                                       | De Universiteit van Utrecht is gelieerd aan de Universiteit van Amsterdam |                                                            |
