# Supplementary material for: Turning the tide: comparison of tidal flow by periodic sea level fluctuation and by periodic bed tilting in scaled landscape experiments of estuaries
Source: Copernicus journal article supplement (doi:10.5194/esurf-5-731-2017), 2017-11-28
Supplement: Supplementary file 4 [file tiltingbasin140712-2200.pdf › tiltingbasin140712-2200.pdf]

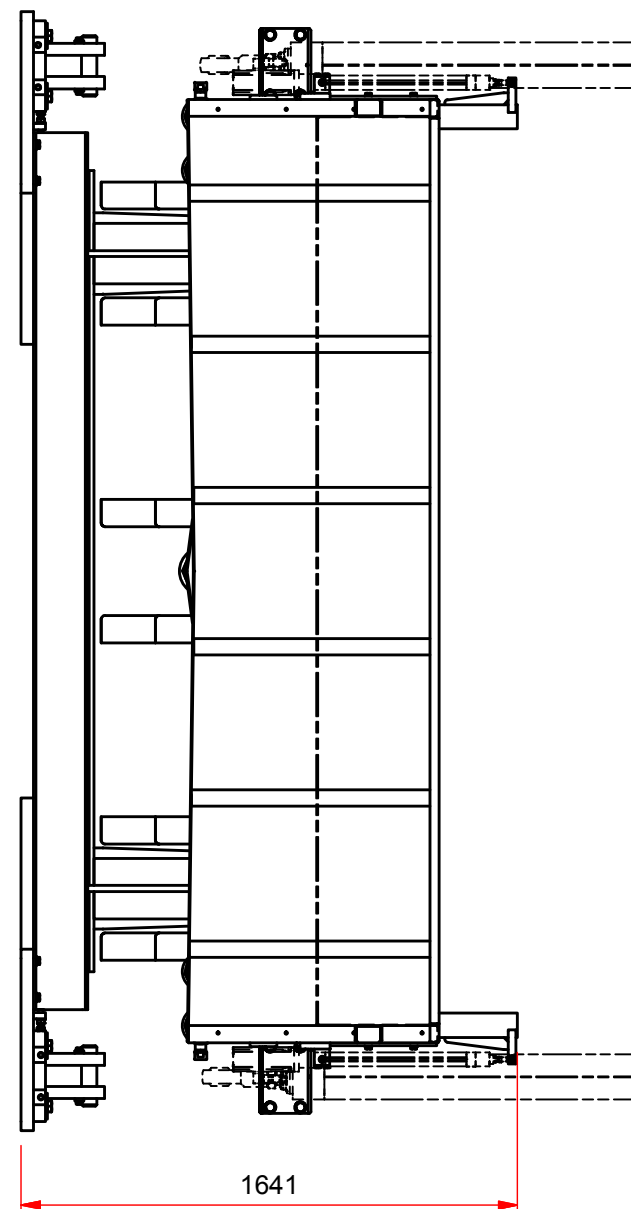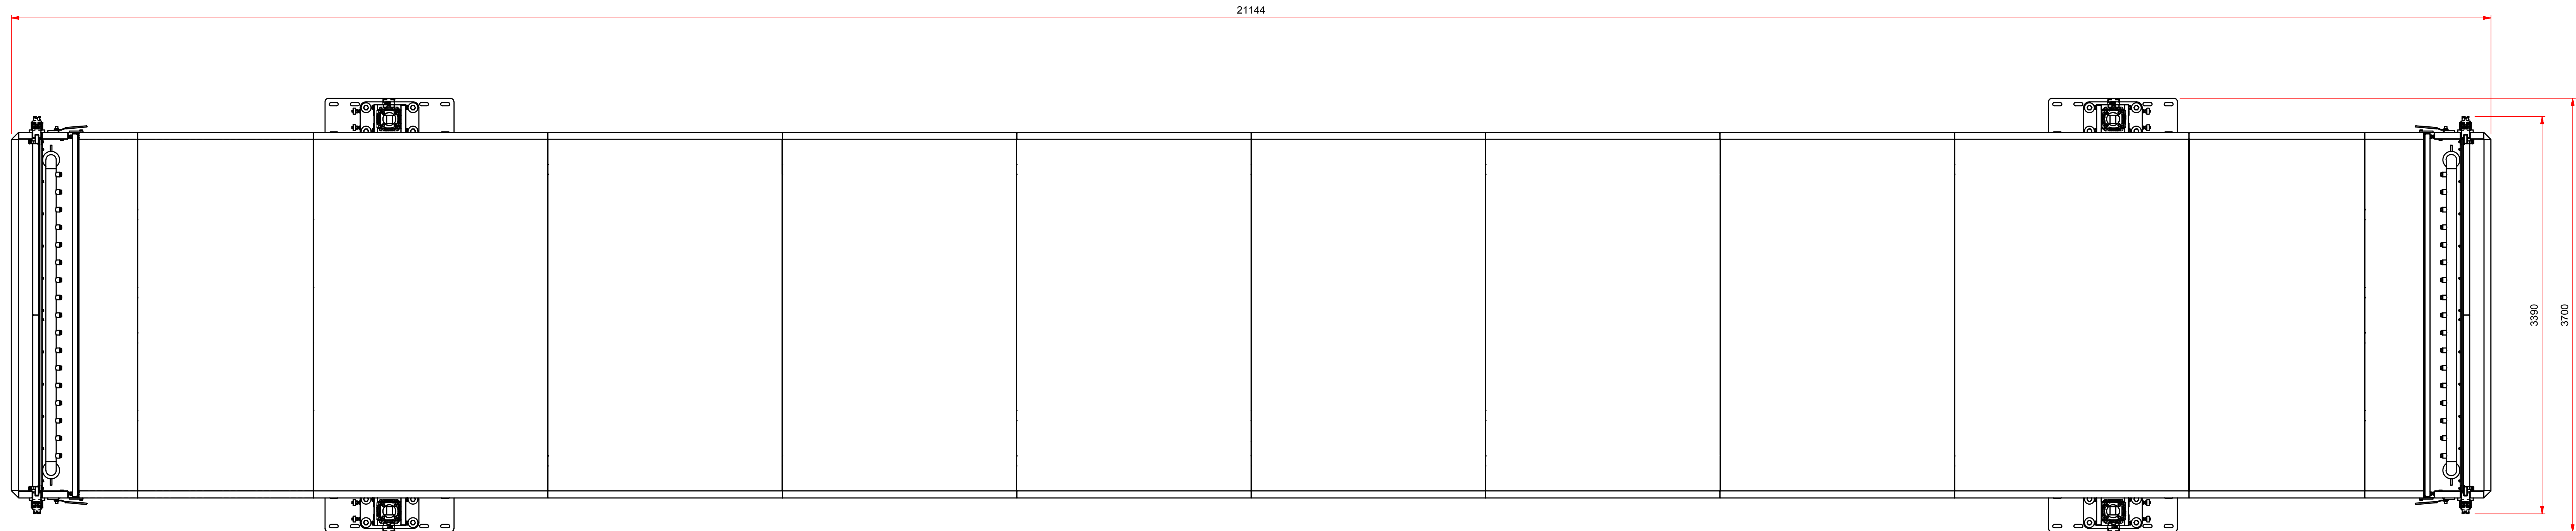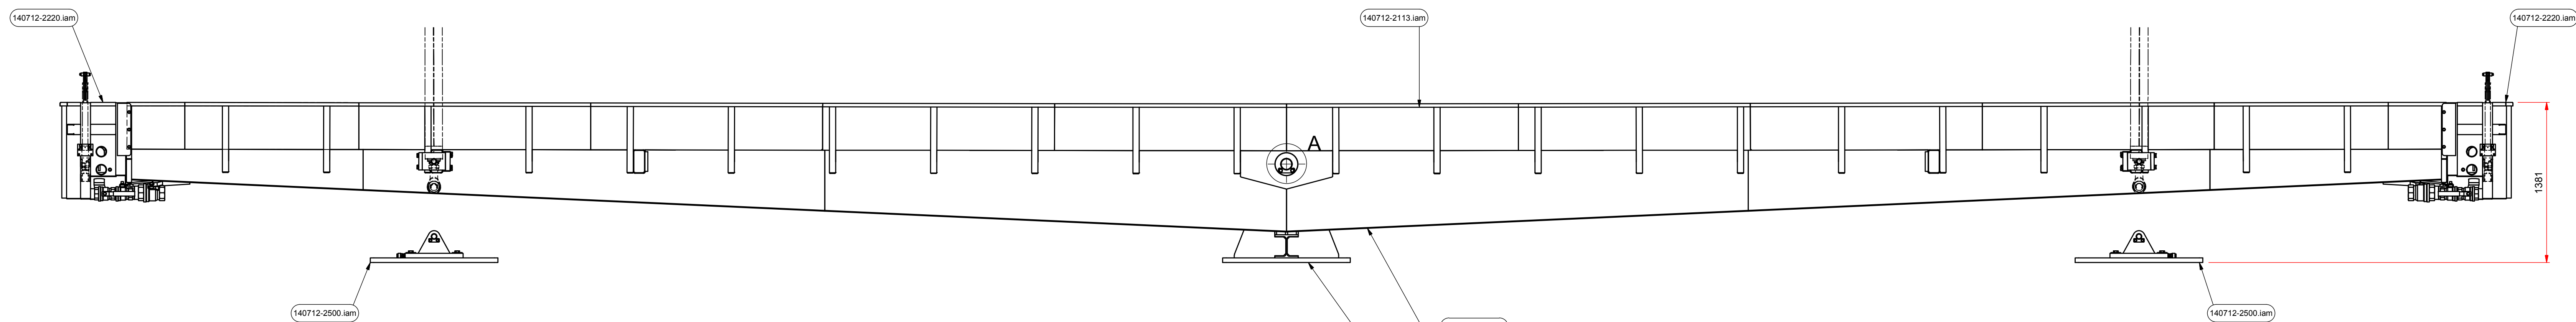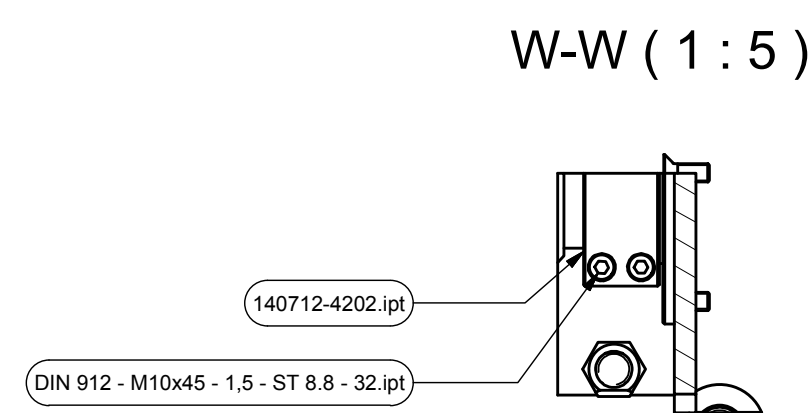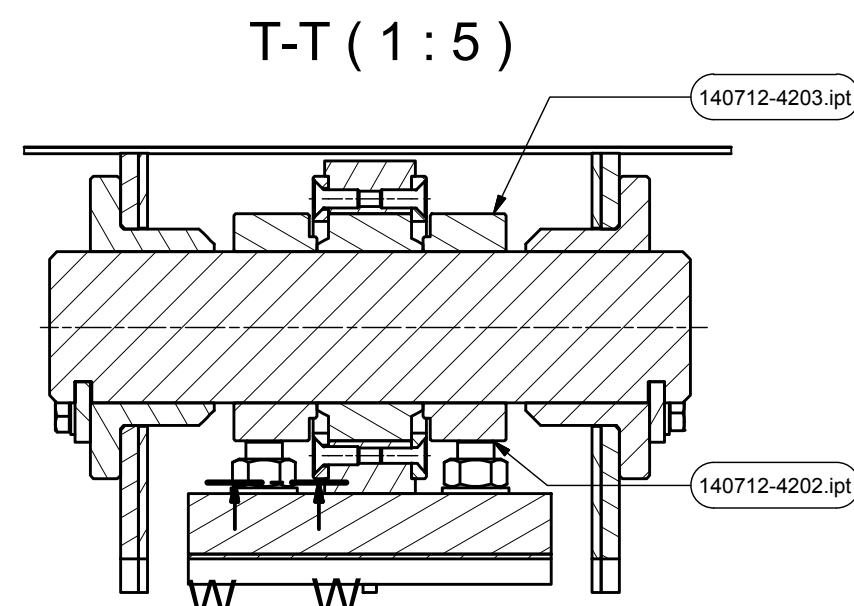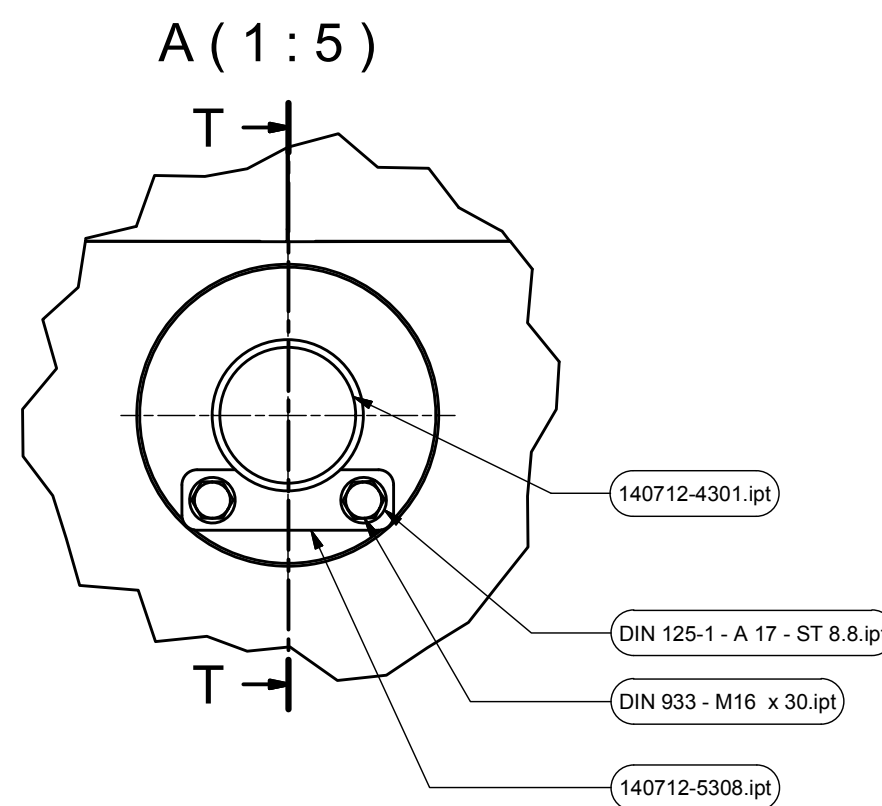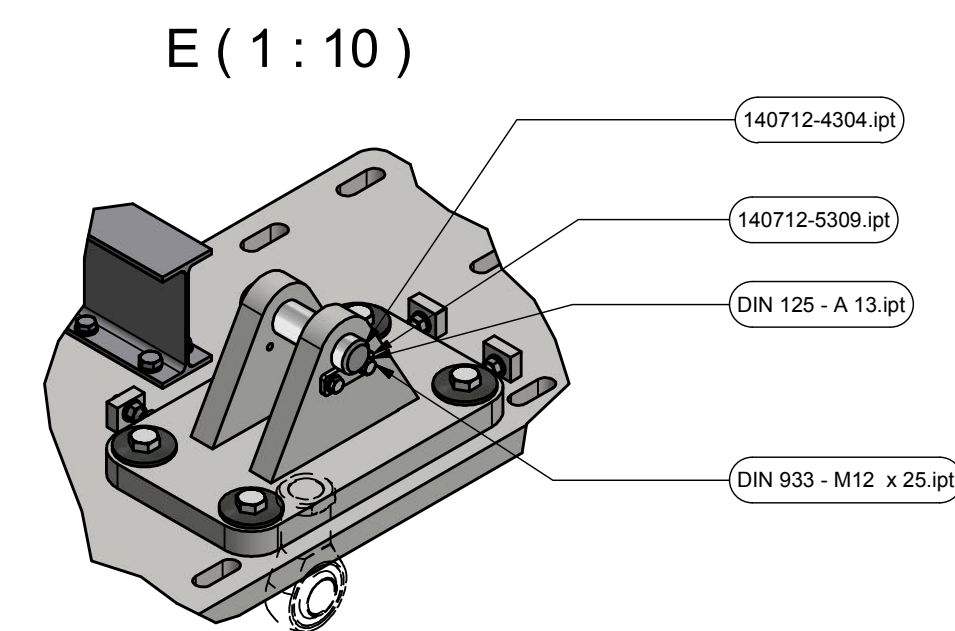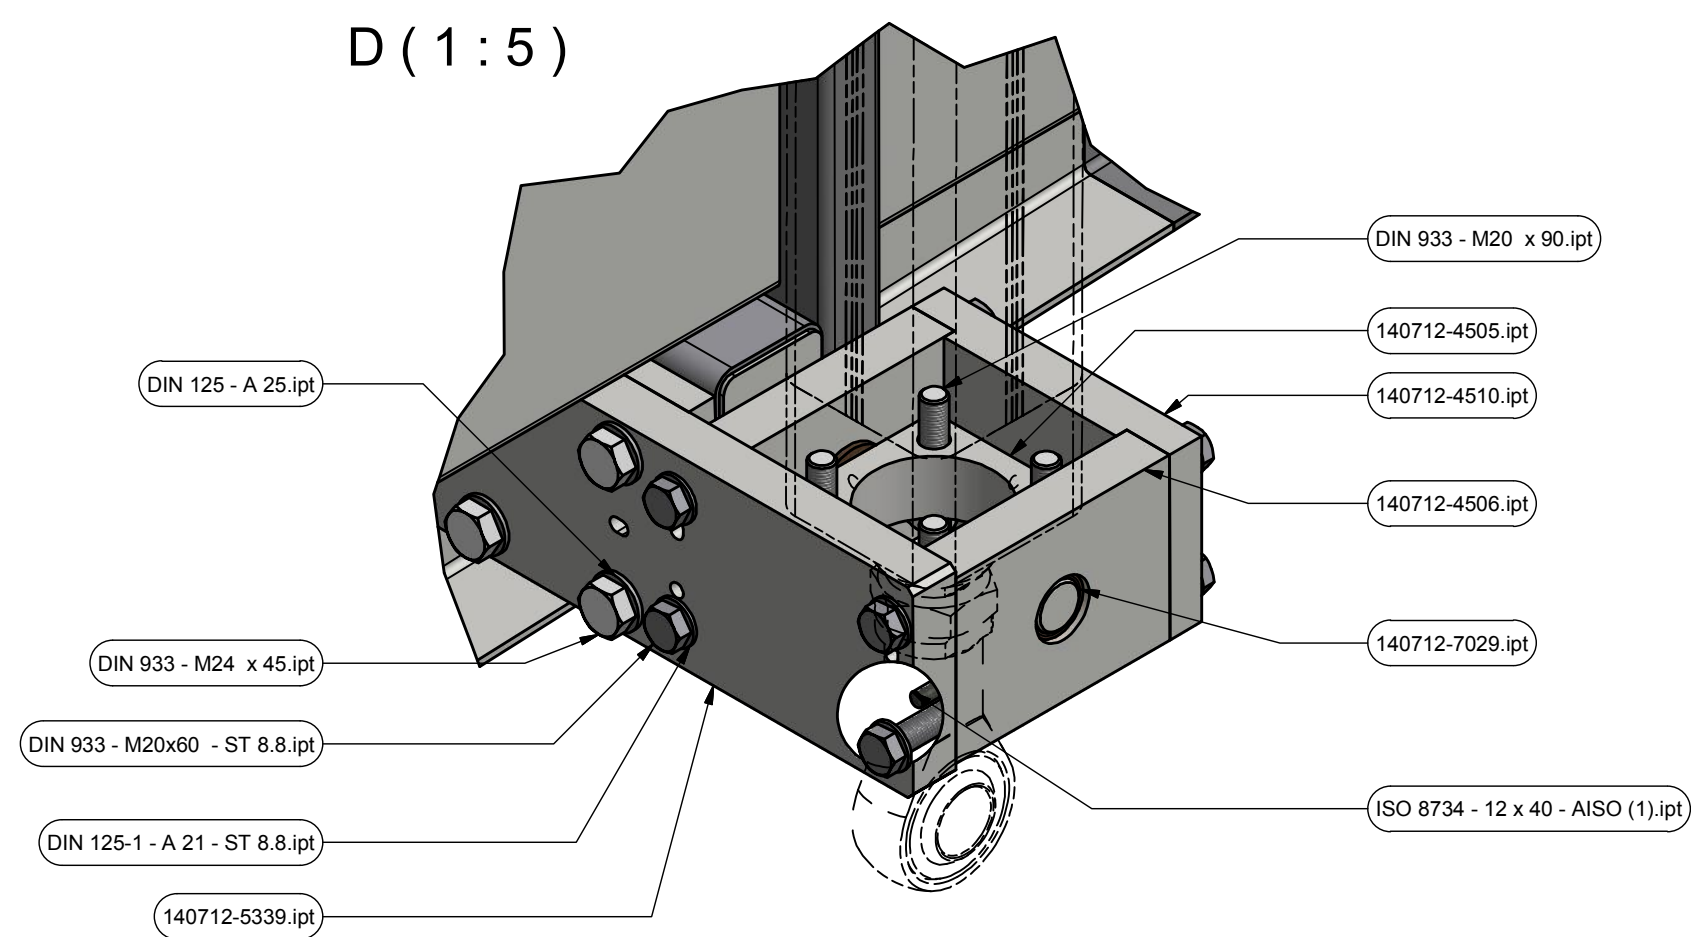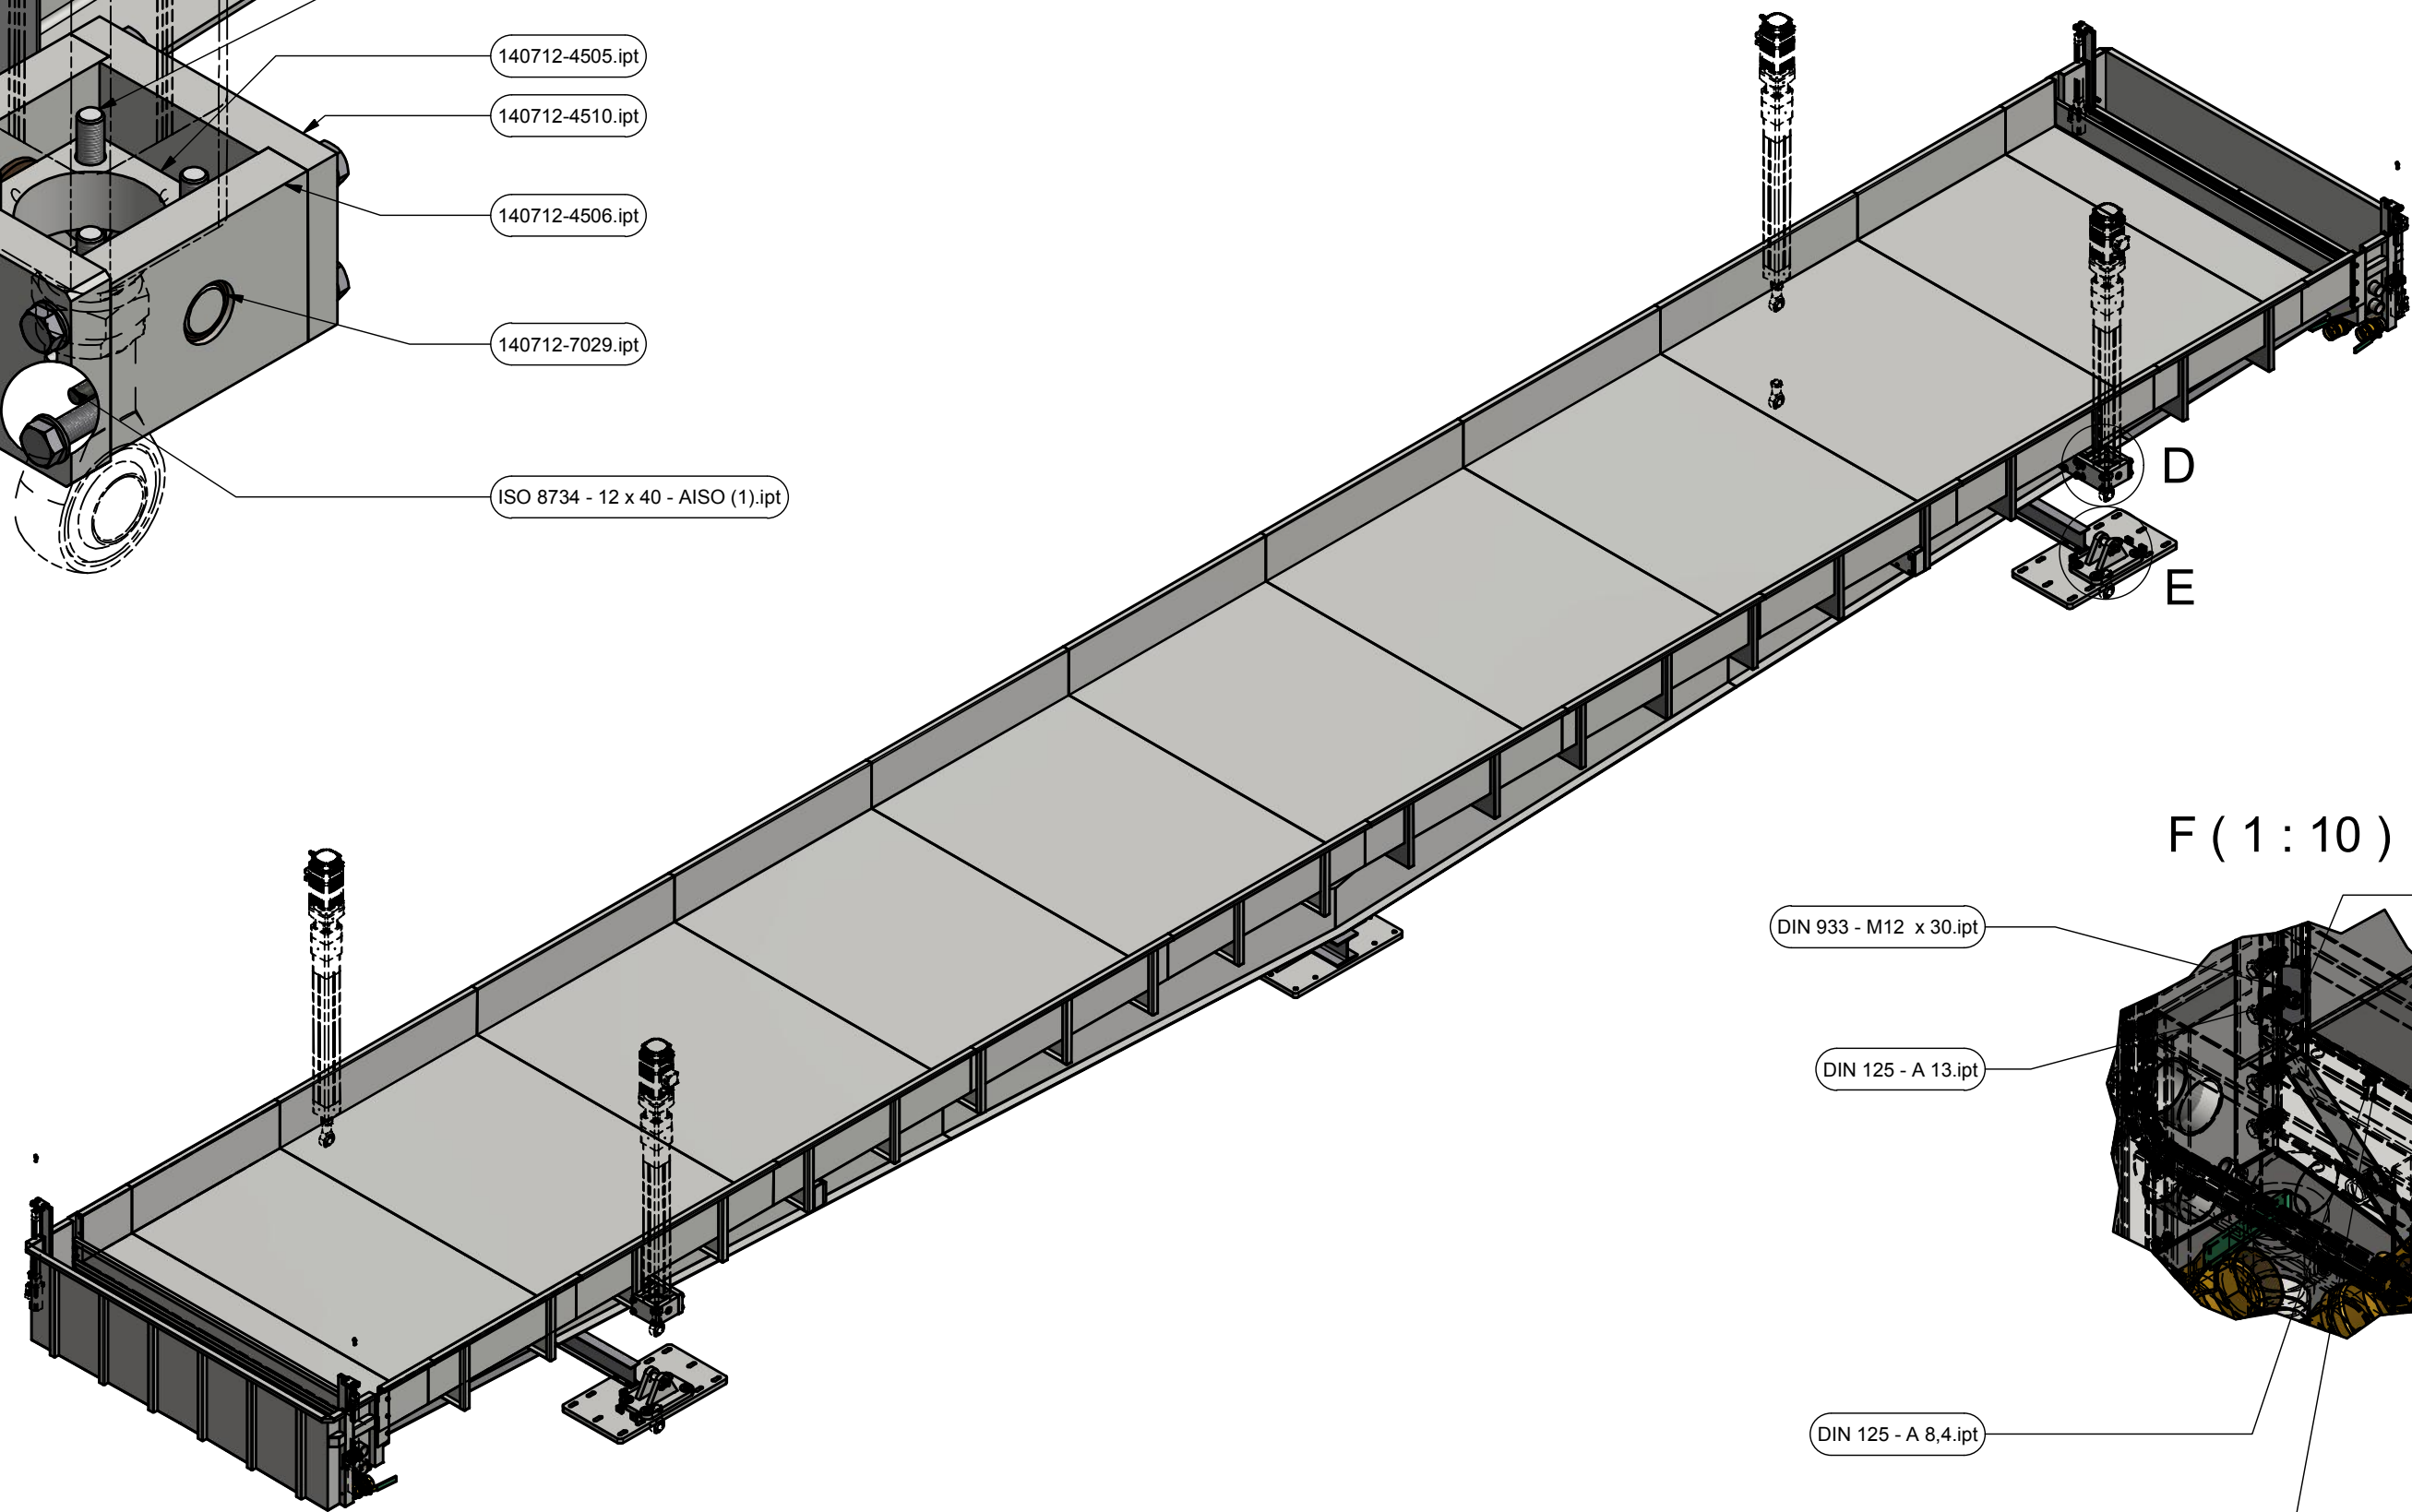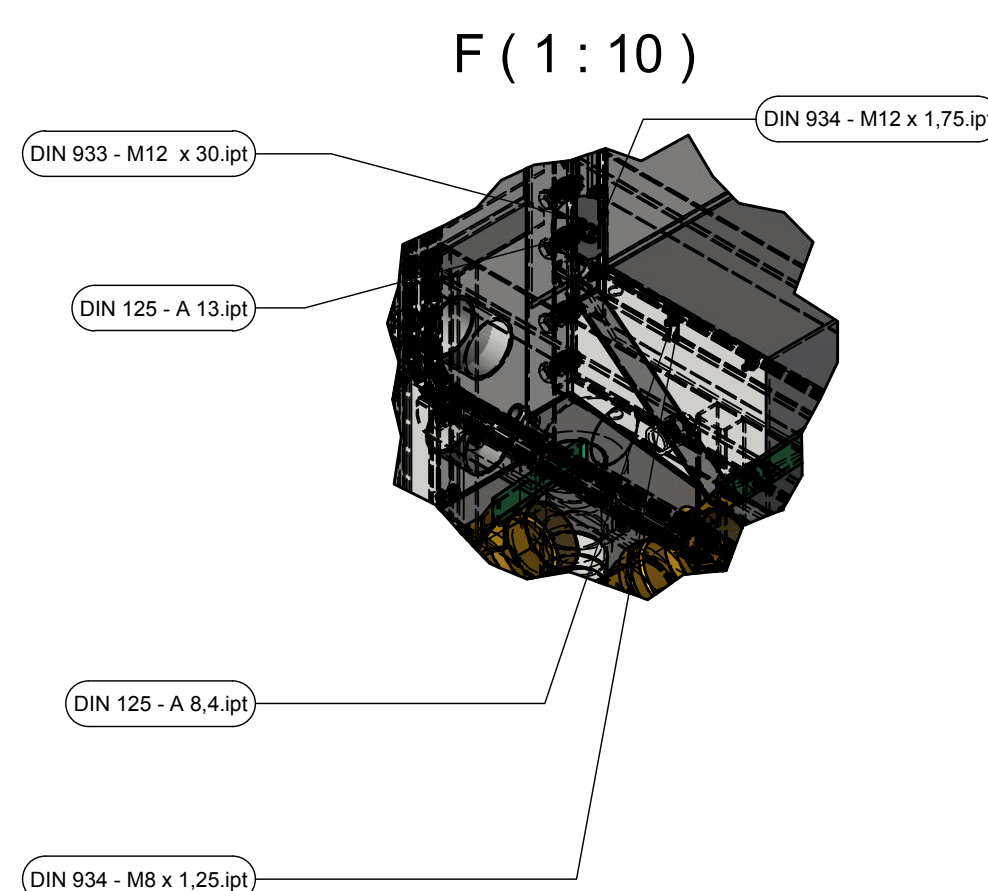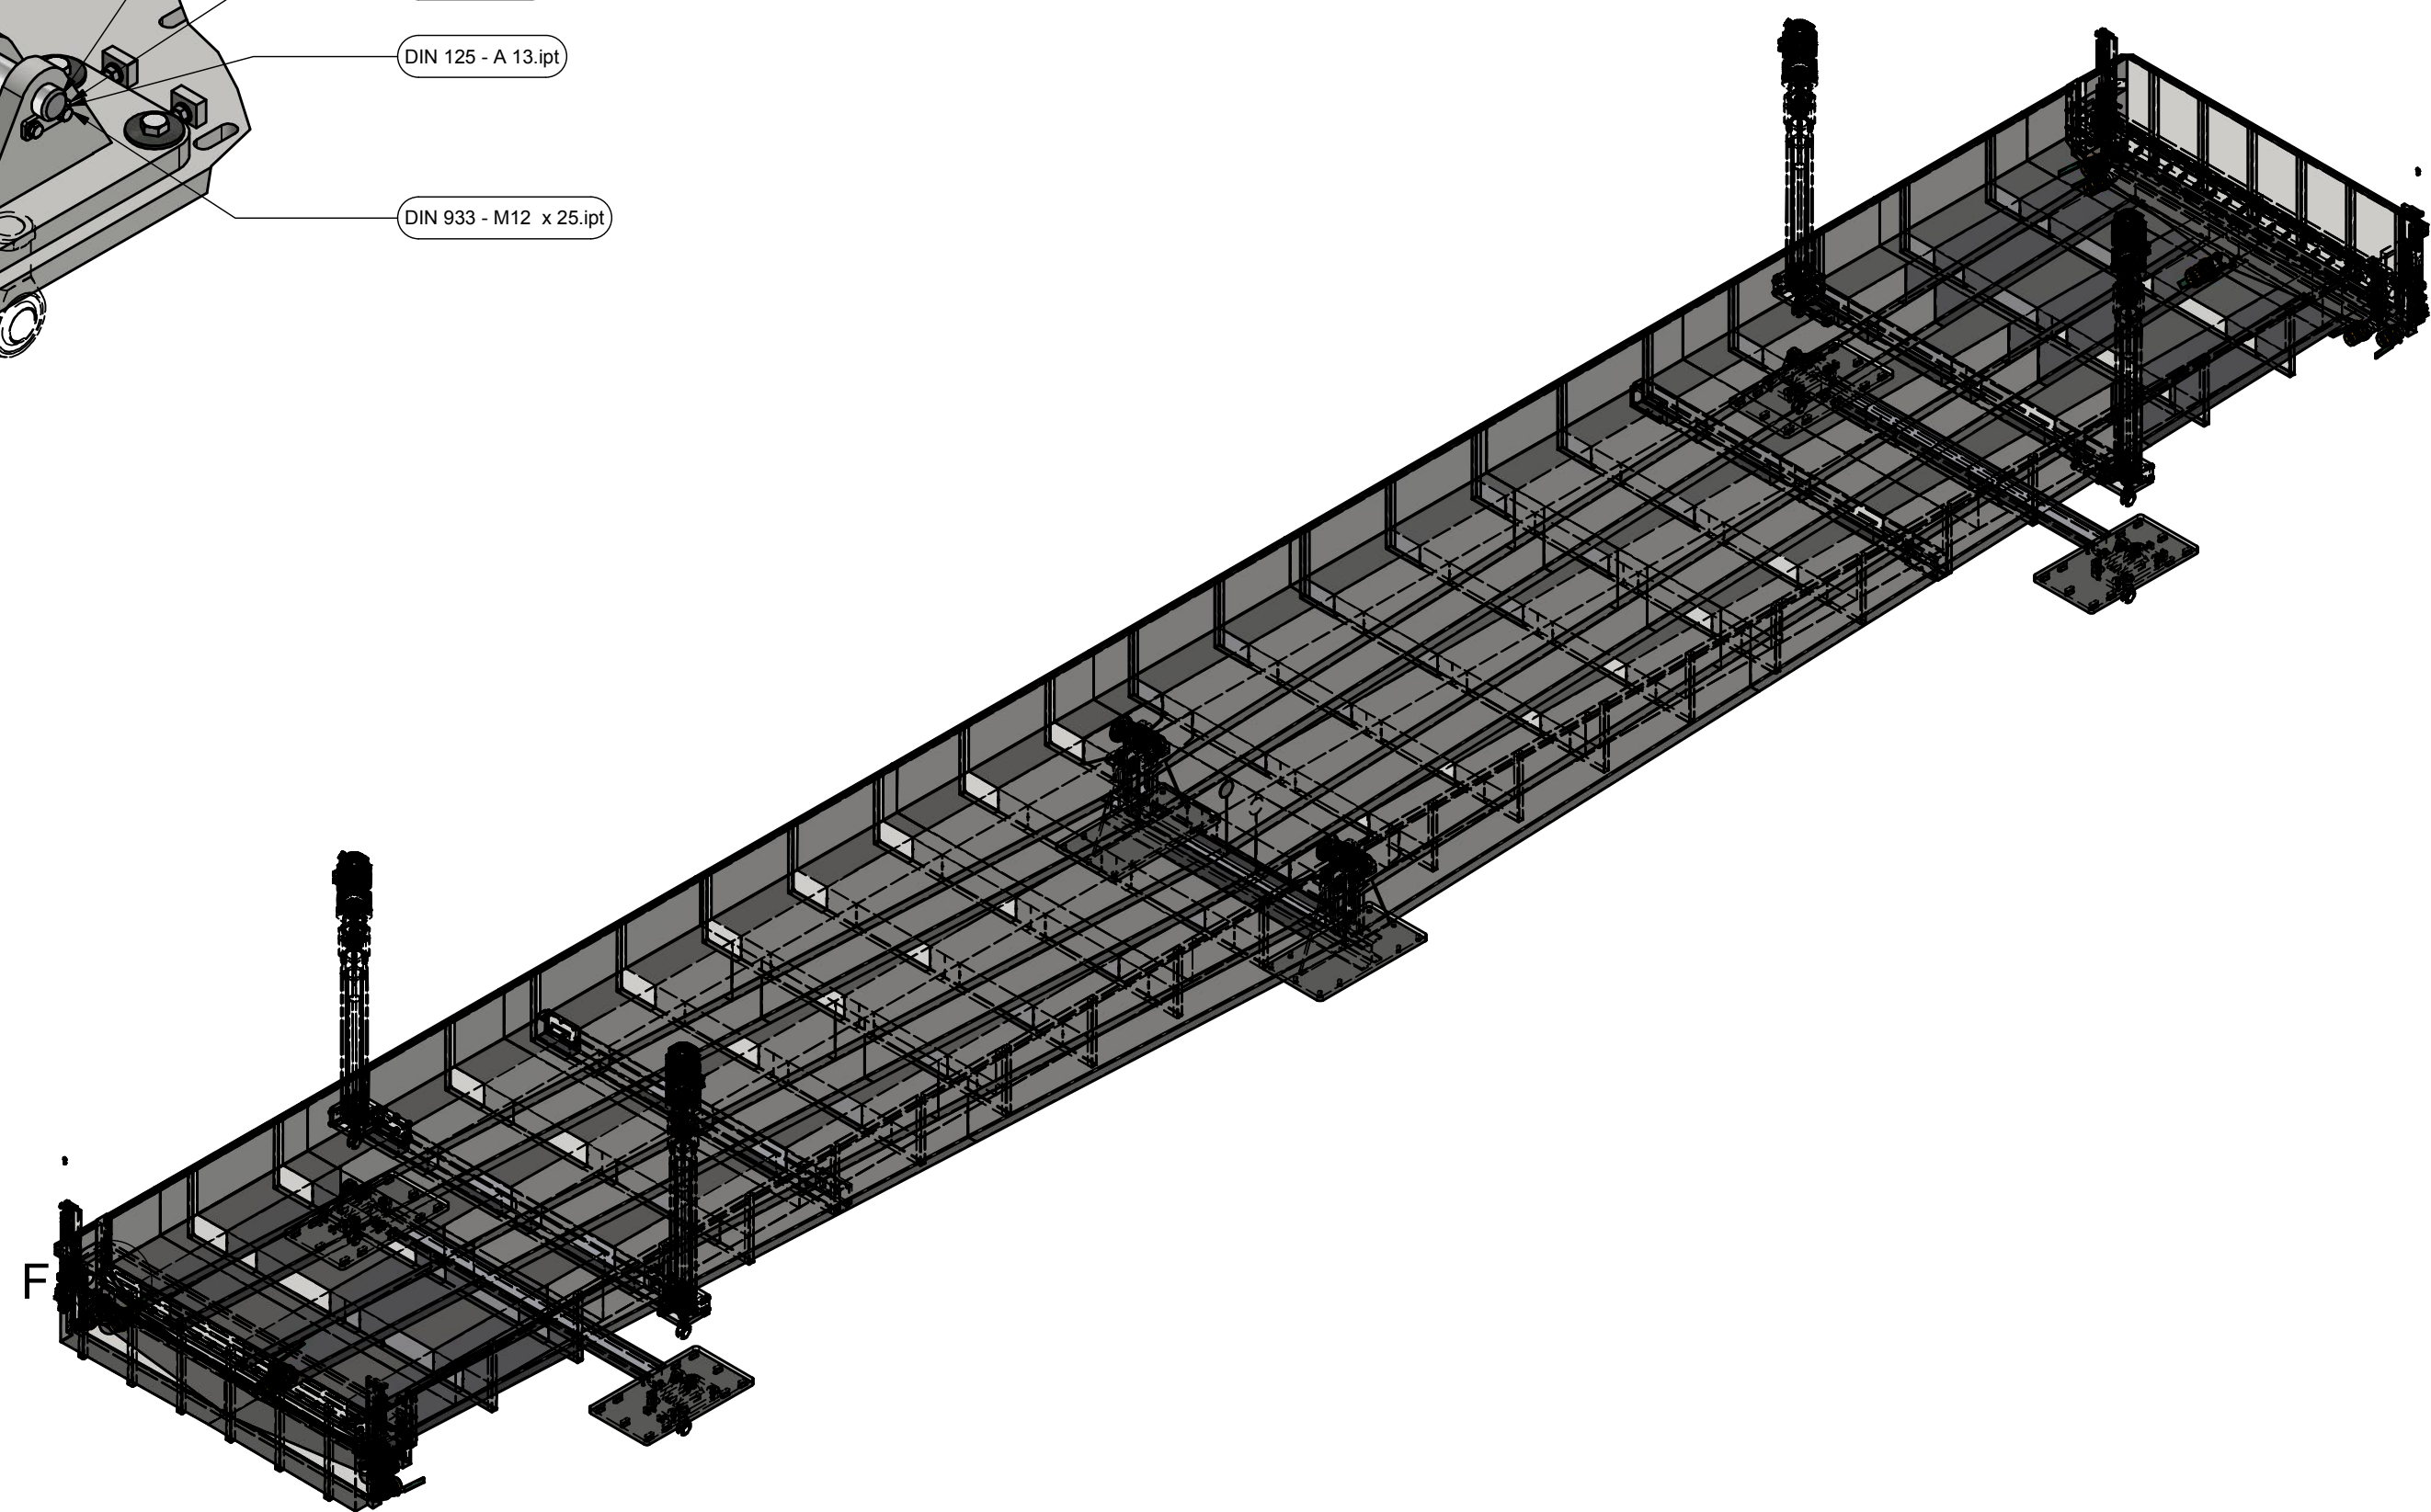

Blad 1 van 2

|              |                      |                 |                 |               |       |
|--------------|----------------------|-----------------|-----------------|---------------|-------|
| Projectnaam  | ACC-ISO 1382         | Rechnungsnummer | ACC-6020188-001 | Revisienummer | 1     |
| Ontwerp      | Universiteit Utrecht | Stroom          | RB              | Formaat       | A0    |
| Project      | PO140712             | Datum           | 3-10-2014       | Bladzijde     | 1 / 2 |
| Ontwerp      | Kantelbak compleet   | Maat            | N/A             | Profiel       |       |
| Scale        | 1:25                 | Released        |                 | Rev           | 0     |
| Drinking Rev |                      |                 |                 |               |       |

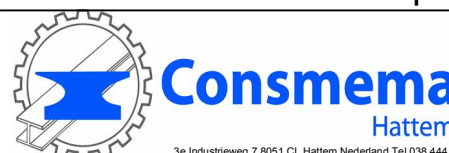

U:\Workspace\Documents\Projects\PO140712 - Universiteit Utrecht - Kantelbak Metroom\2000 - Samenstelling\140712-2200.dwg



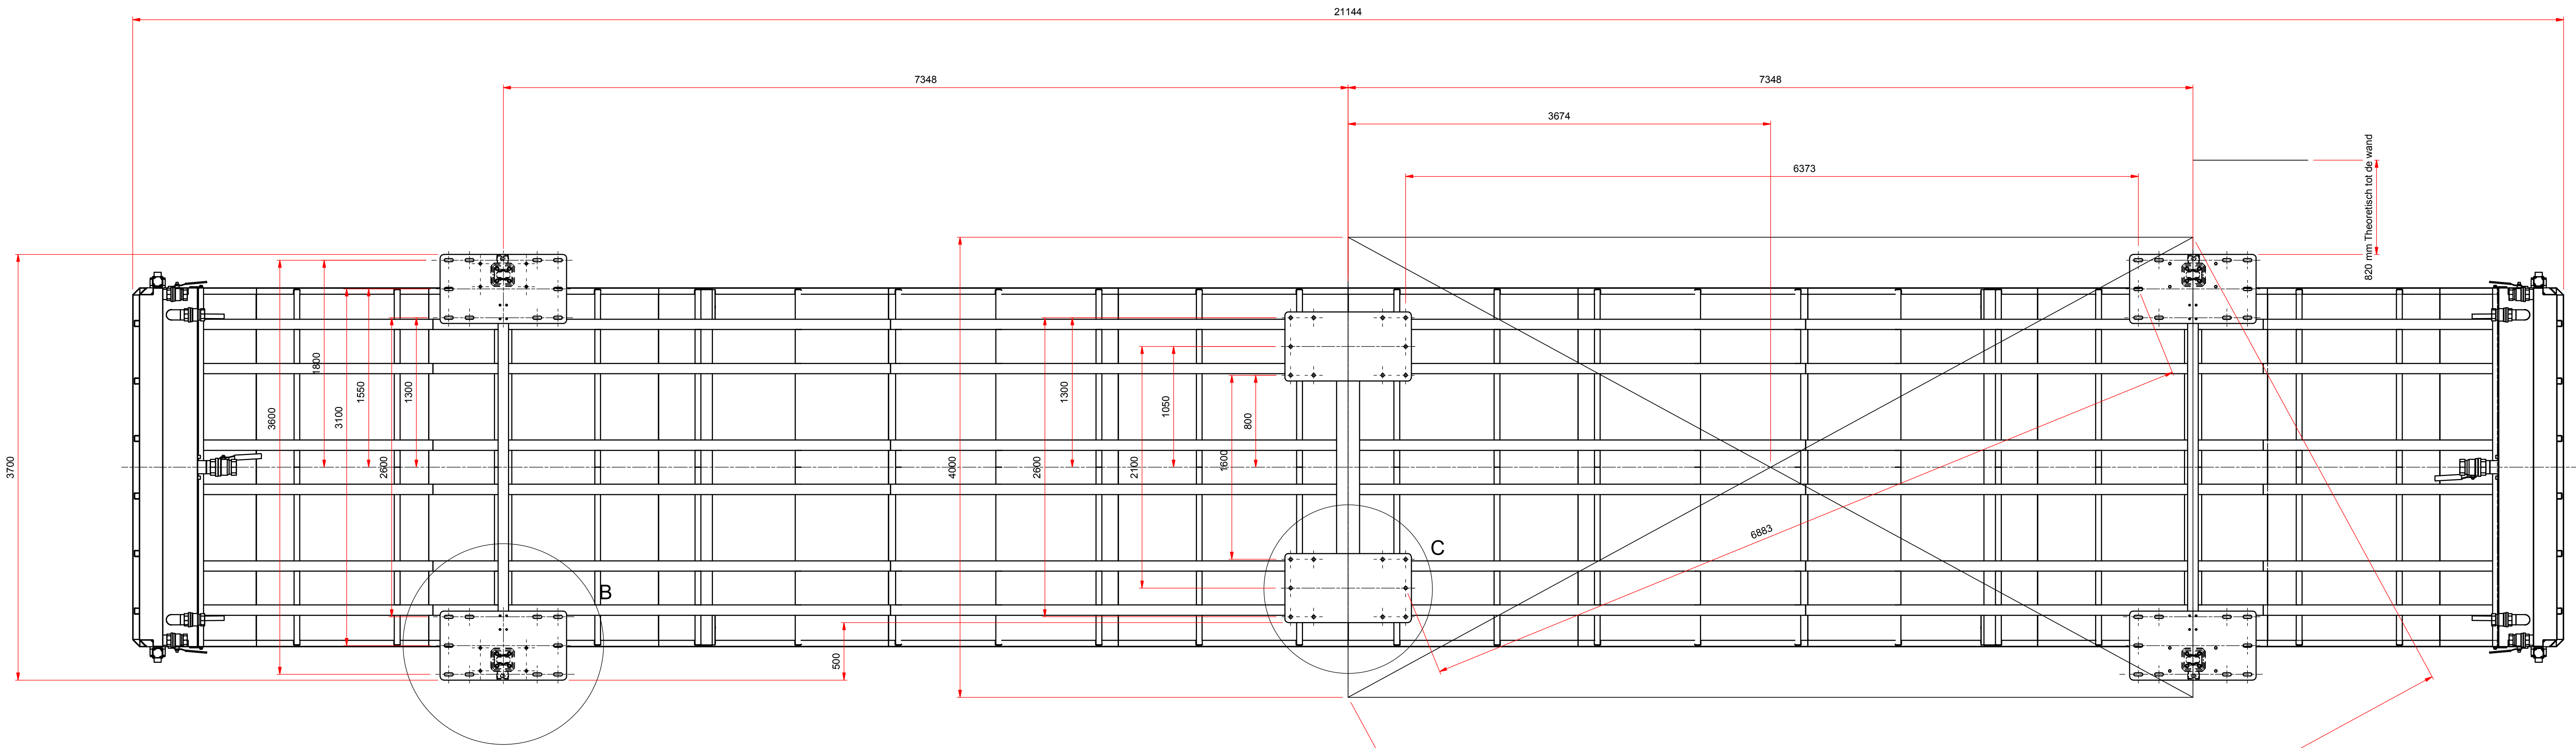

LOKATIE BEVESTIGINGSPLATEN ( 1 : 25 )

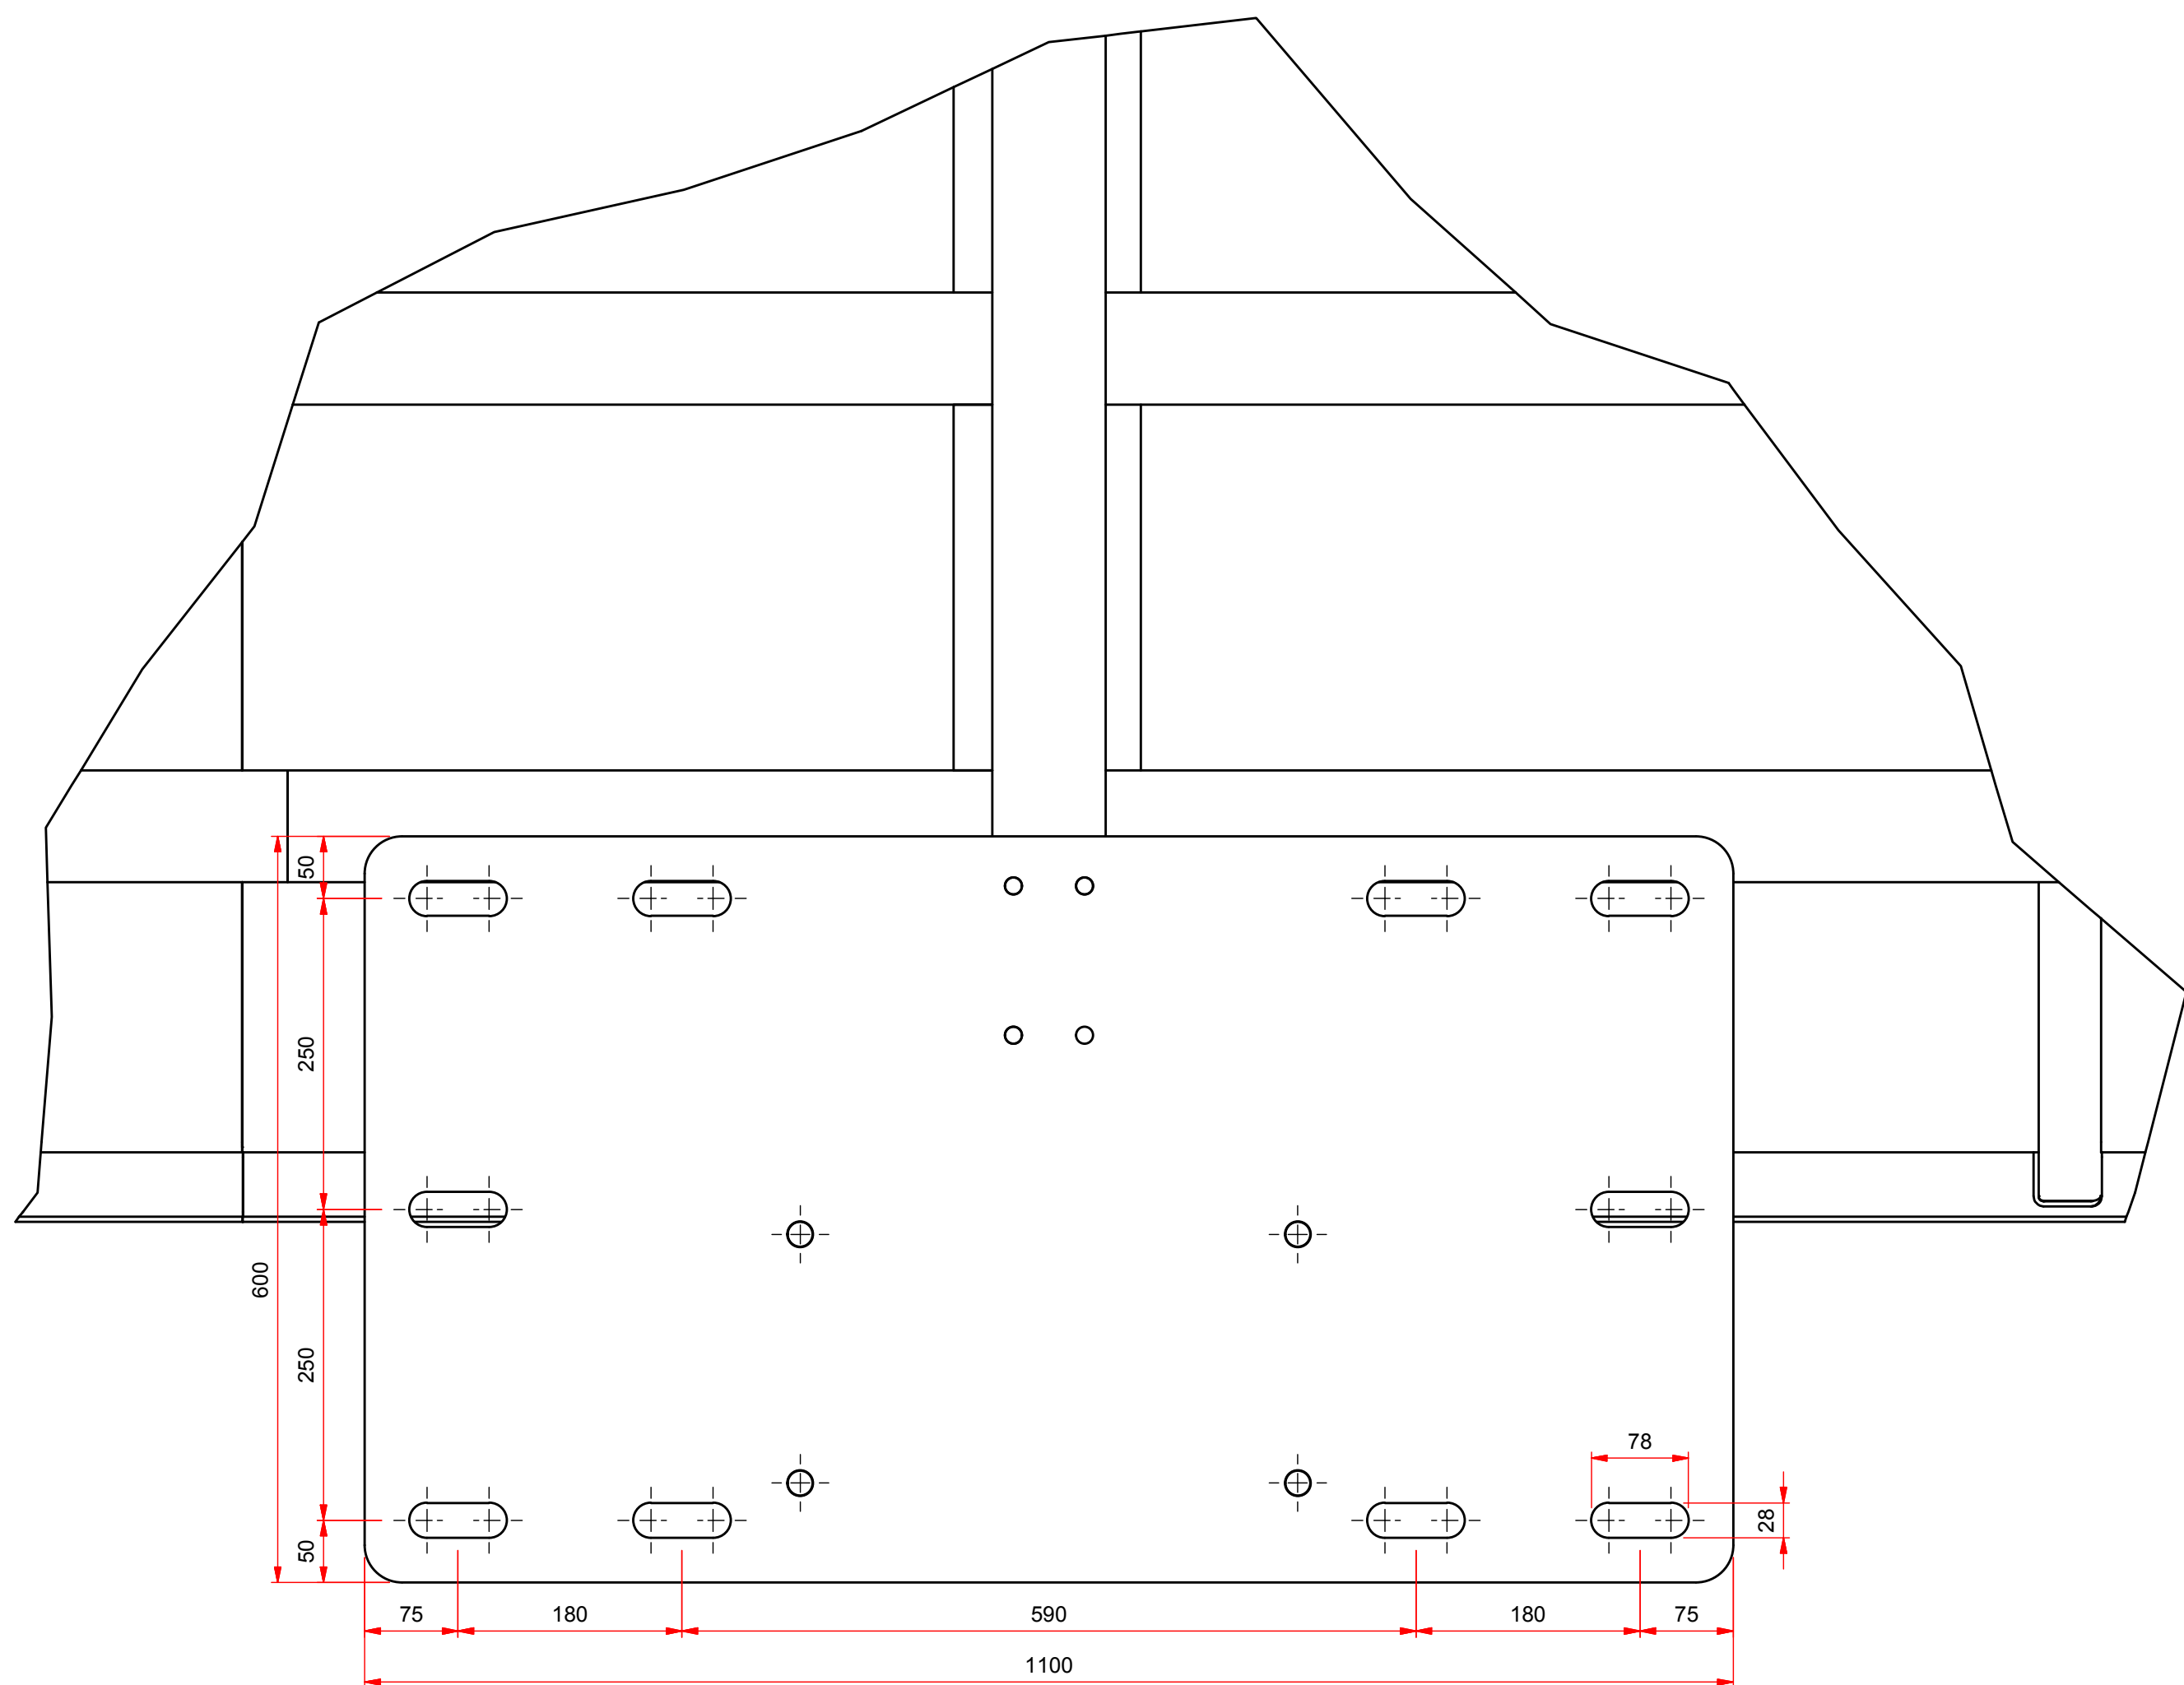

B ( 1 : 5 )

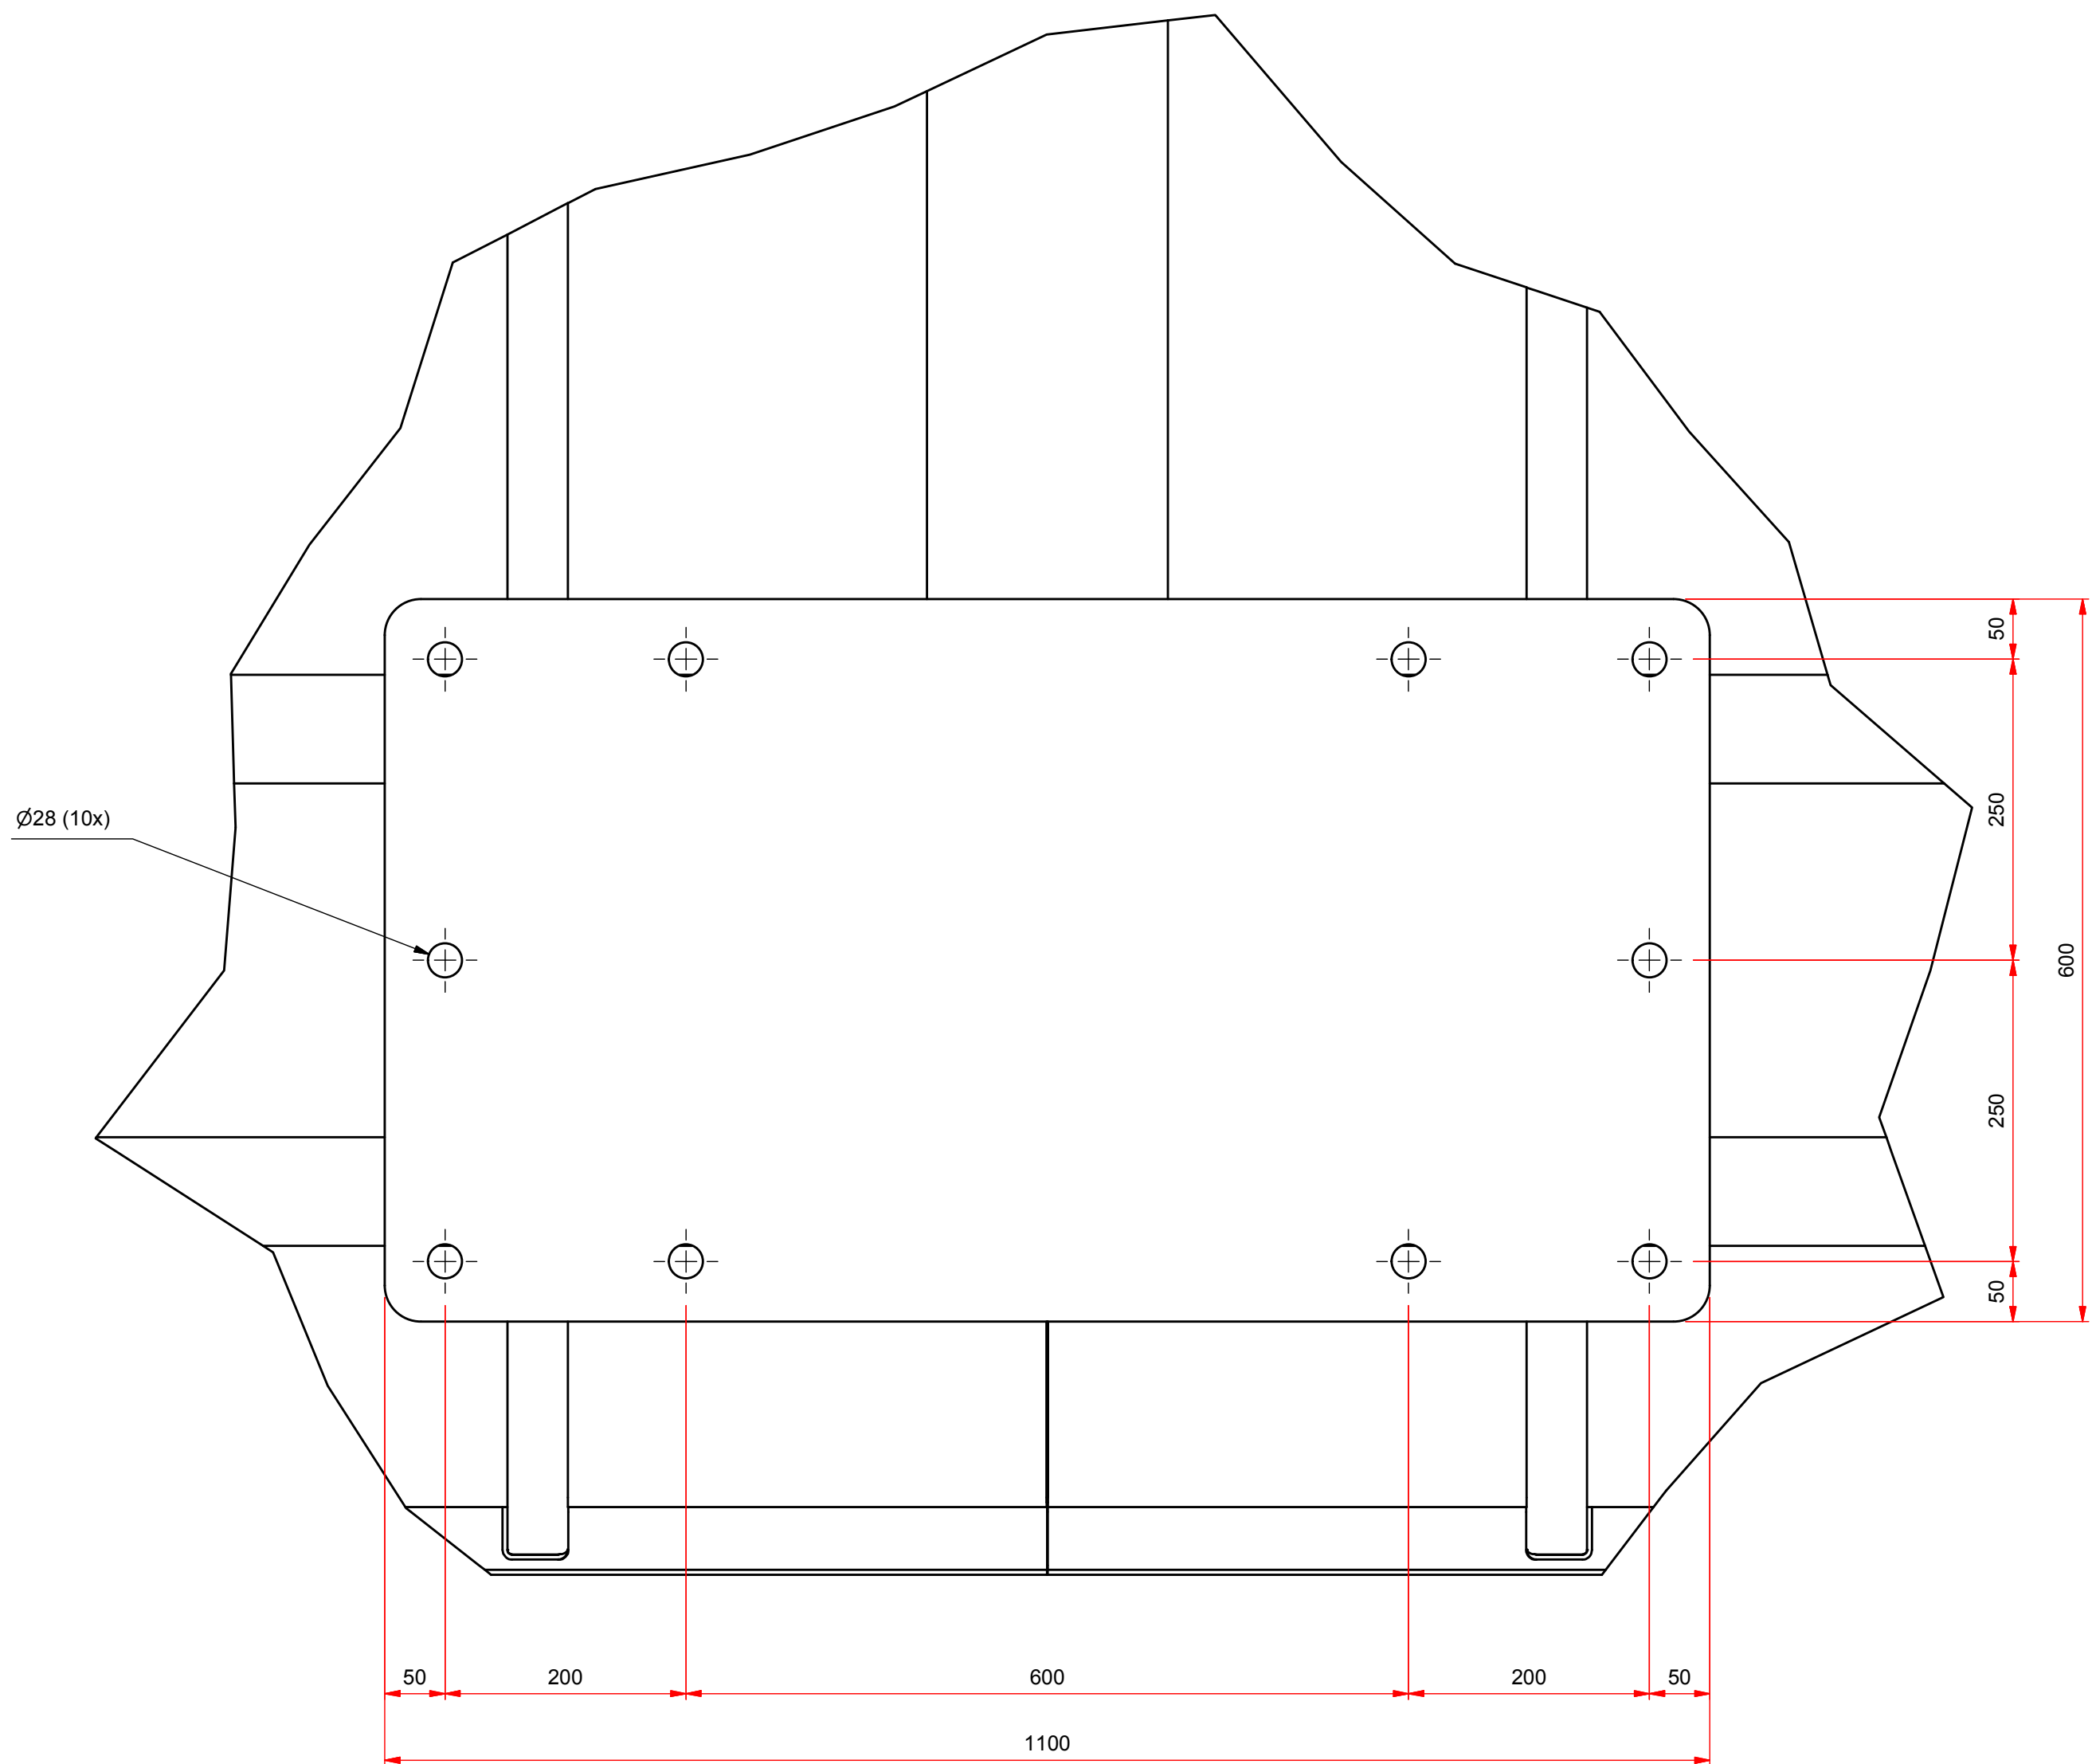

C ( 1 : 5 )
