# Supplementary material for: Turning the tide: comparison of tidal flow by periodic sea level fluctuation and by periodic bed tilting in scaled landscape experiments of estuaries
Source: Copernicus journal article supplement (doi:10.5194/esurf-5-731-2017), 2017-11-28
Supplement: Supplementary file [file esurf-5-731-2017-supplement-title-page.pdf › esurf-5-731-2017-supplement-title-page.pdf]

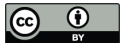

## *Supplement of*

# **Turning the tide: comparison of tidal flow by periodic sea level fluctuation and by periodic bed tilting in scaled landscape experiments of estuaries**

**Maarten G. Kleinhans et al.**

*Correspondence to:* Maarten G. Kleinhans ([m.g.kleinhans@uu.nl](mailto:m.g.kleinhans@uu.nl))

- [esurf-5-731-2017-supplement-title-page.pdf](#)
- [actuatorsupport140712-2500.pdf](#)
- [centralsupport140712-2300.pdf](#)
- [endbasin140712-2220.pdf](#)
- [tiltingbasin140712-2200.pdf](#)

The copyright of individual parts of the supplement might differ from the CC BY 3.0 License.
