# Supplementary figures and images for: Turning the tide: comparison of tidal flow by periodic sea level fluctuation and by periodic bed tilting in scaled landscape experiments of estuaries
Source: Copernicus journal article supplement (doi:10.5194/esurf-5-731-2017), 2017-11-28

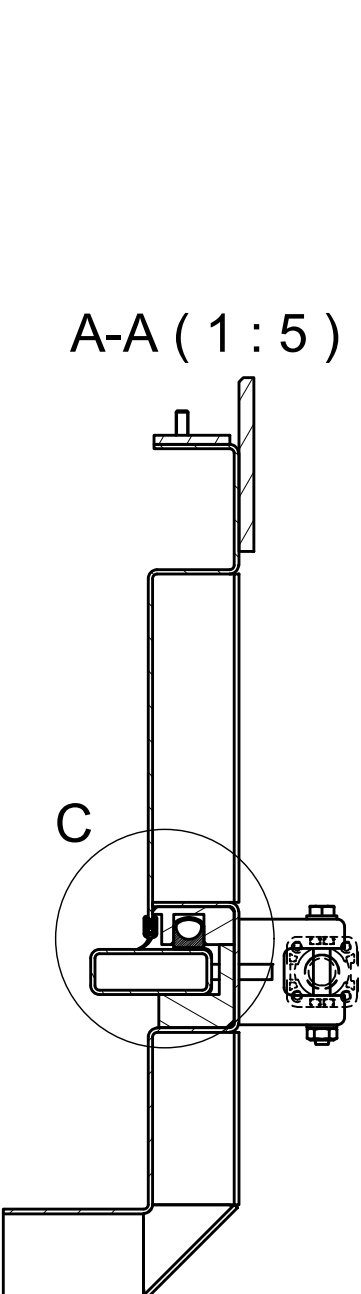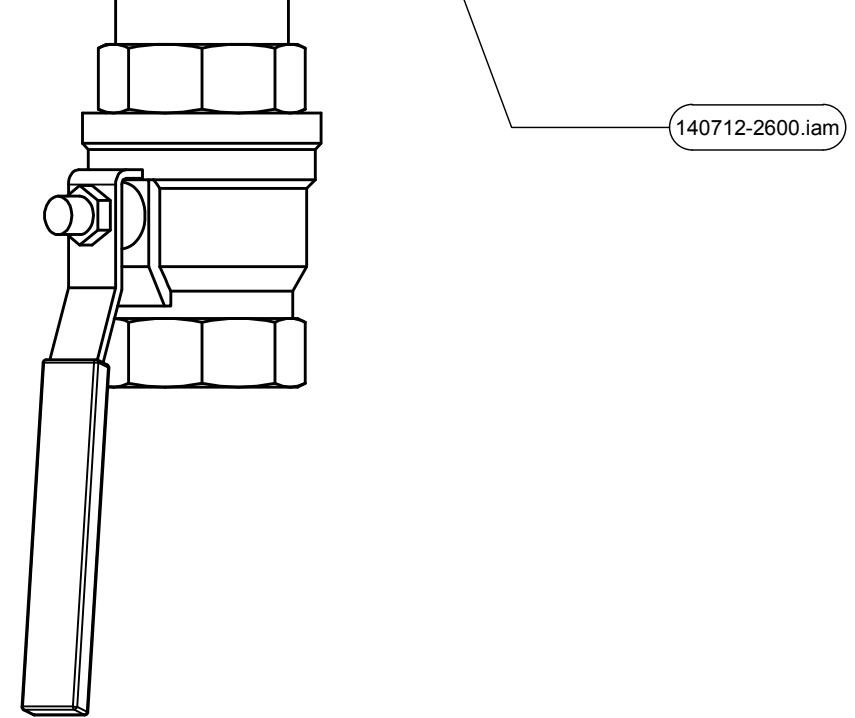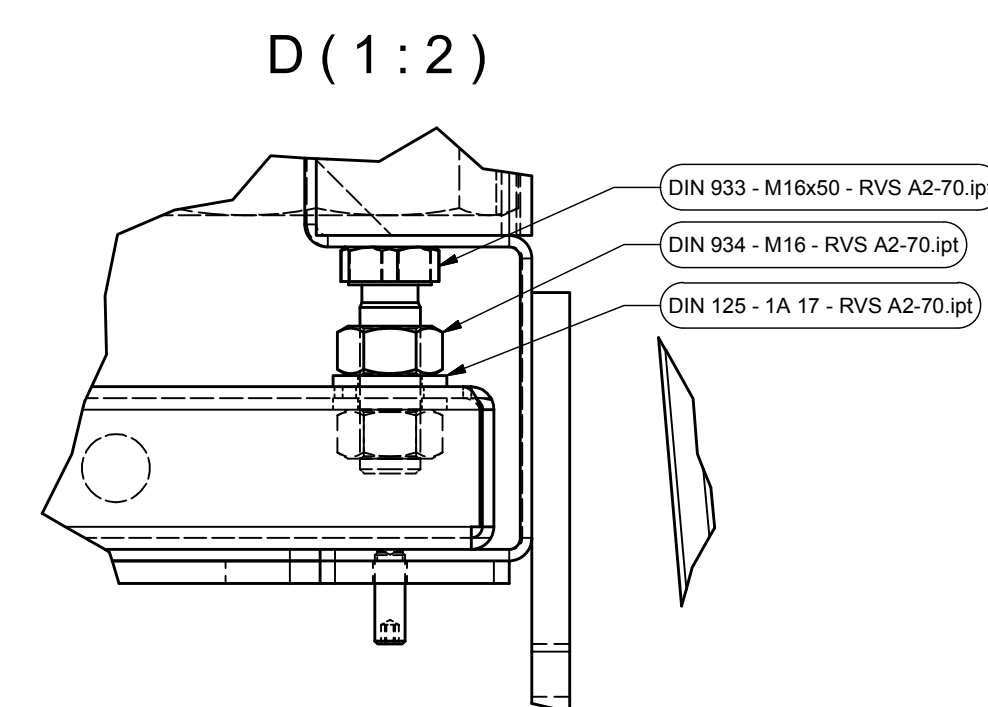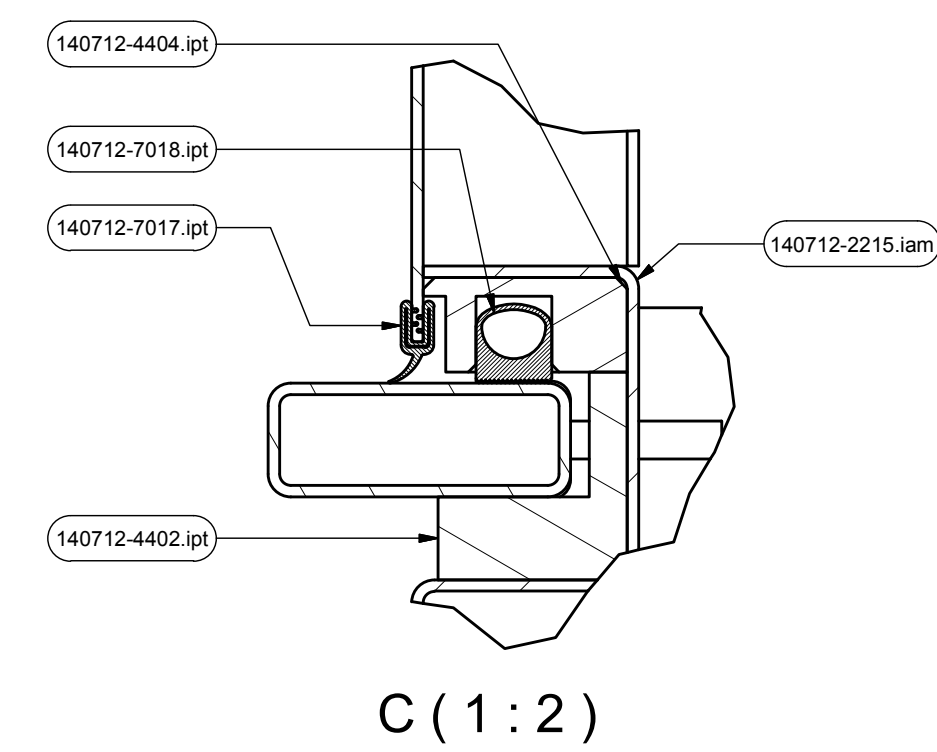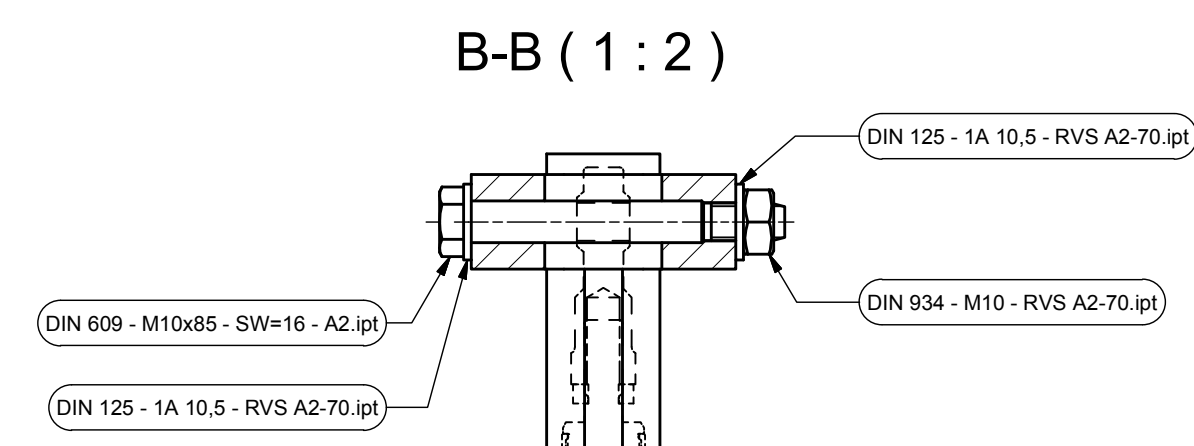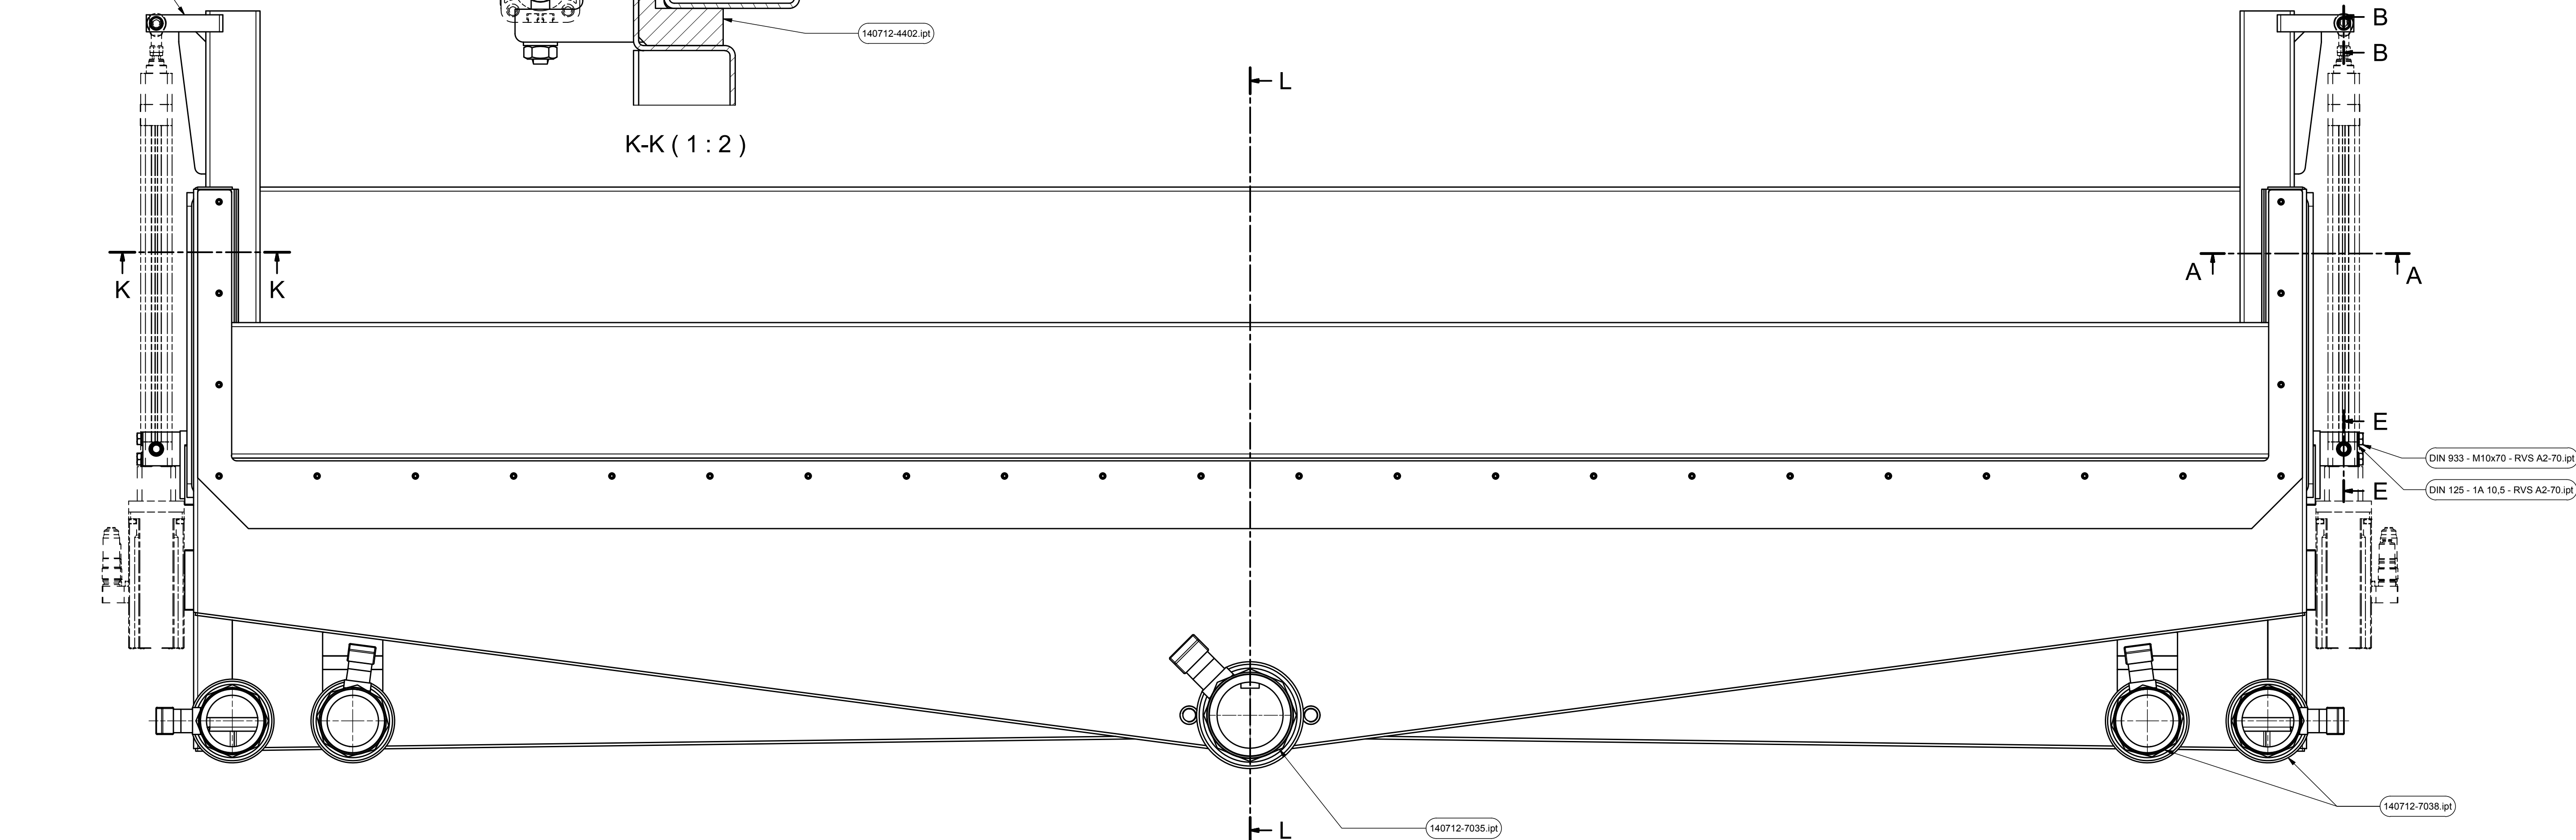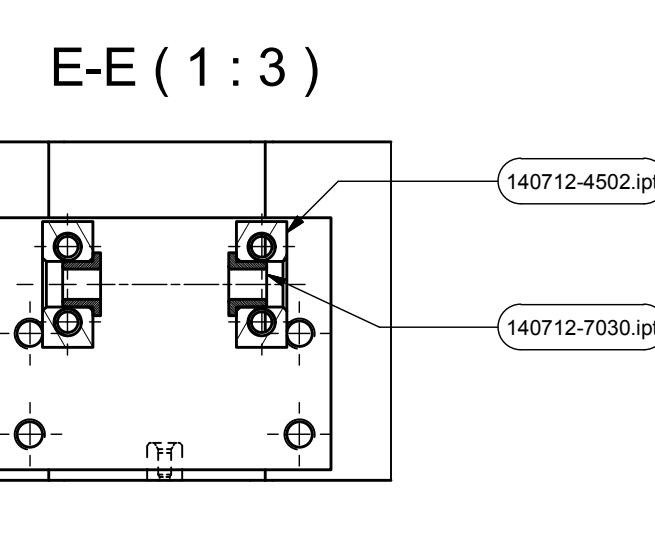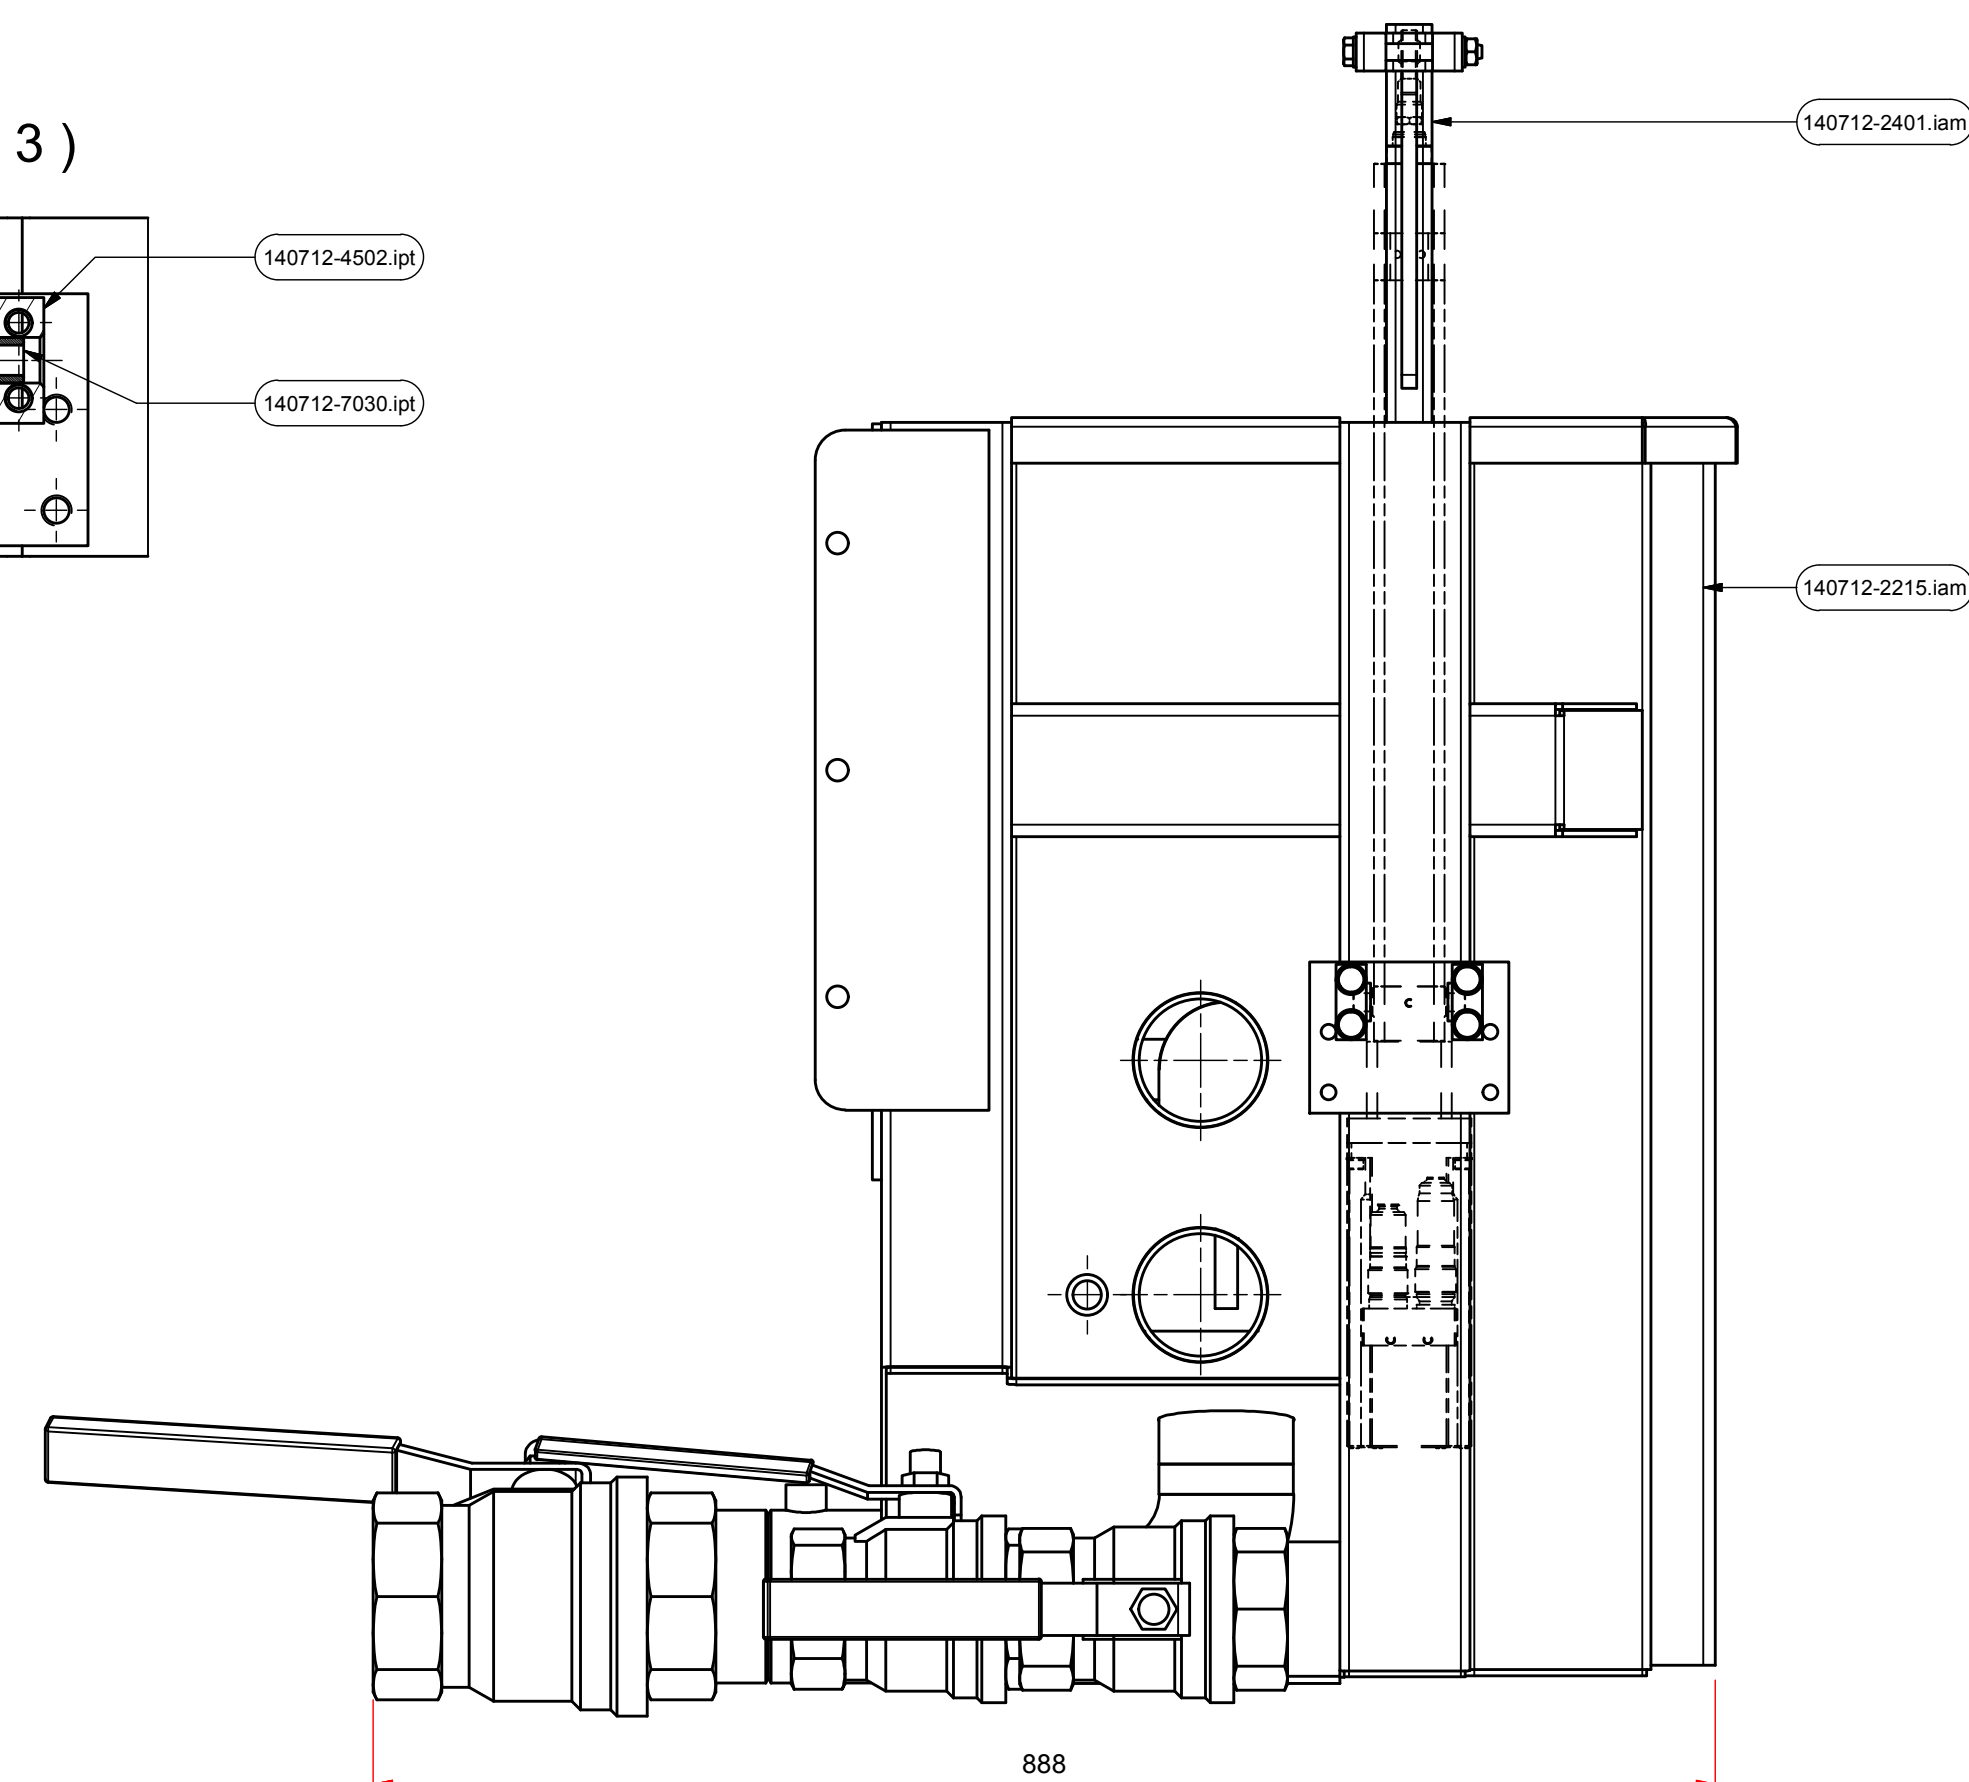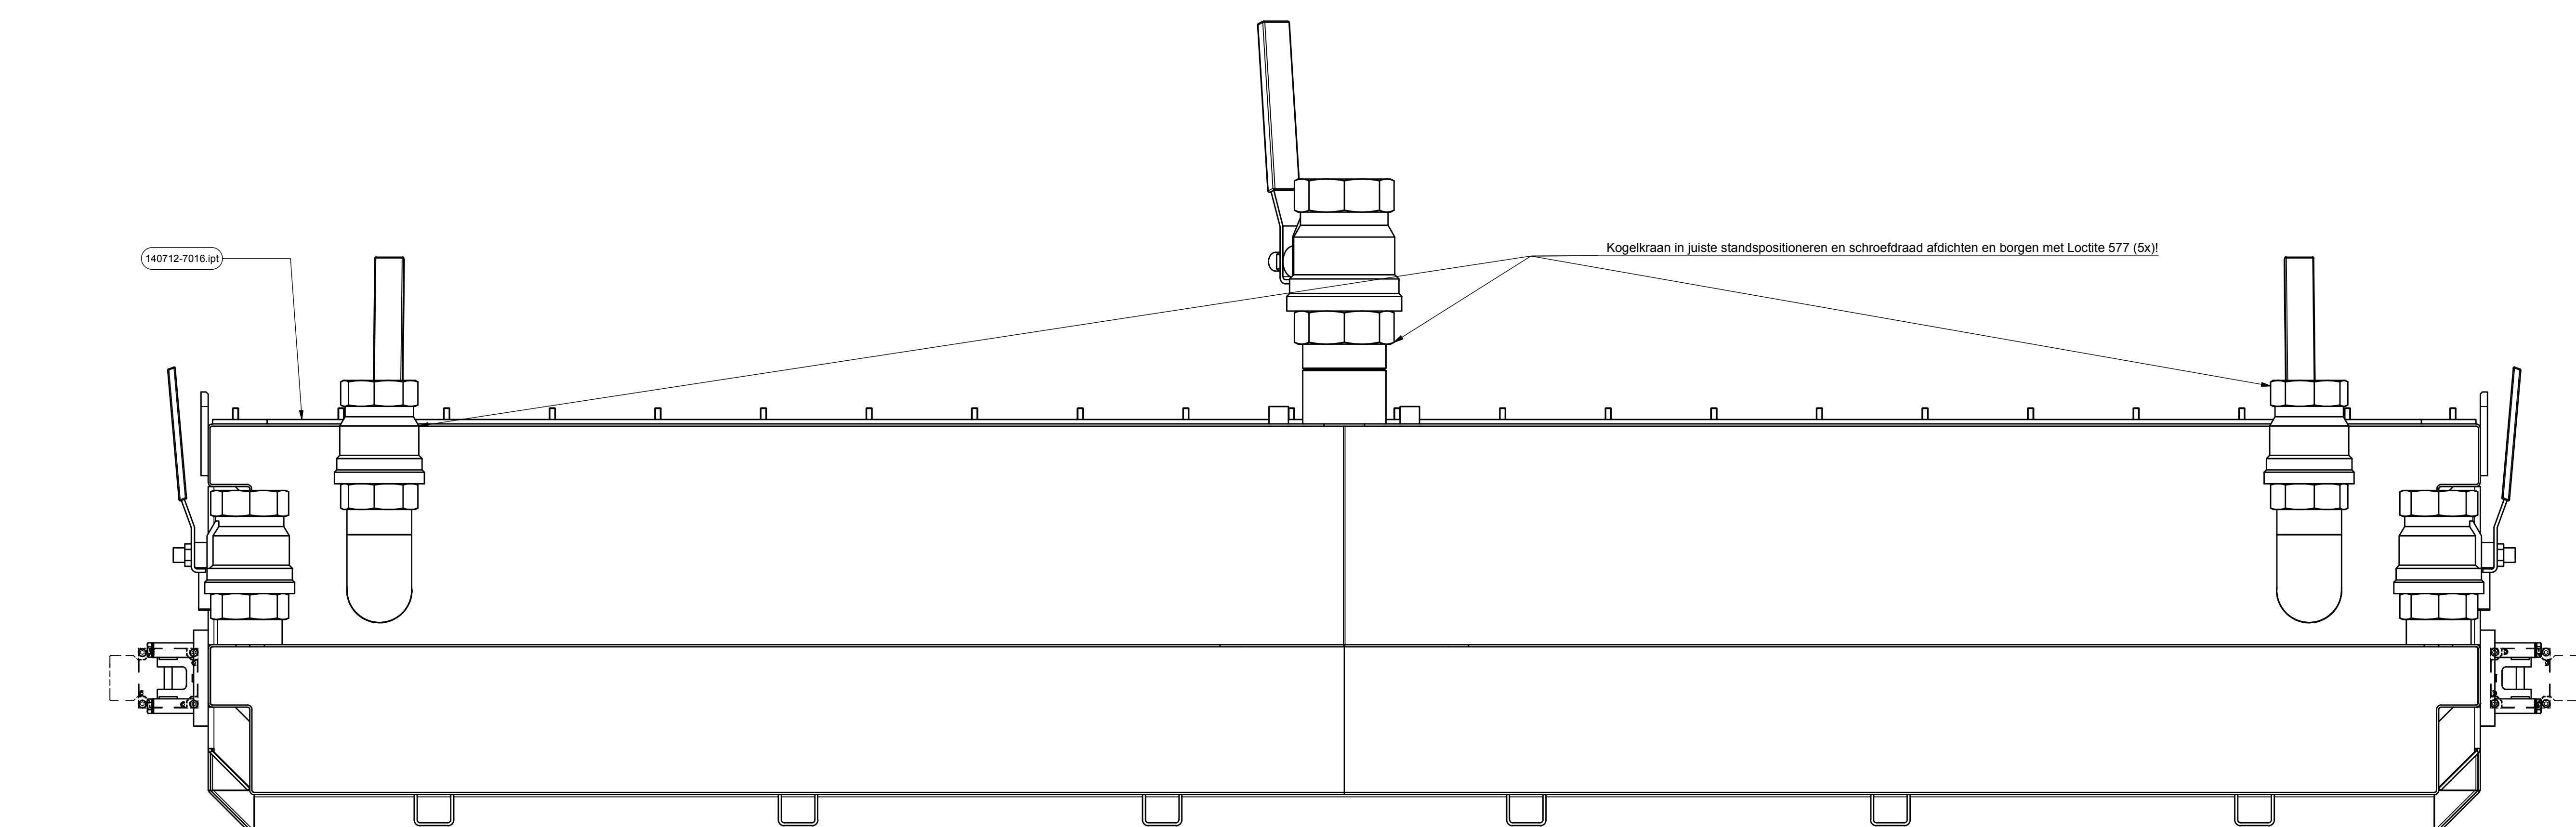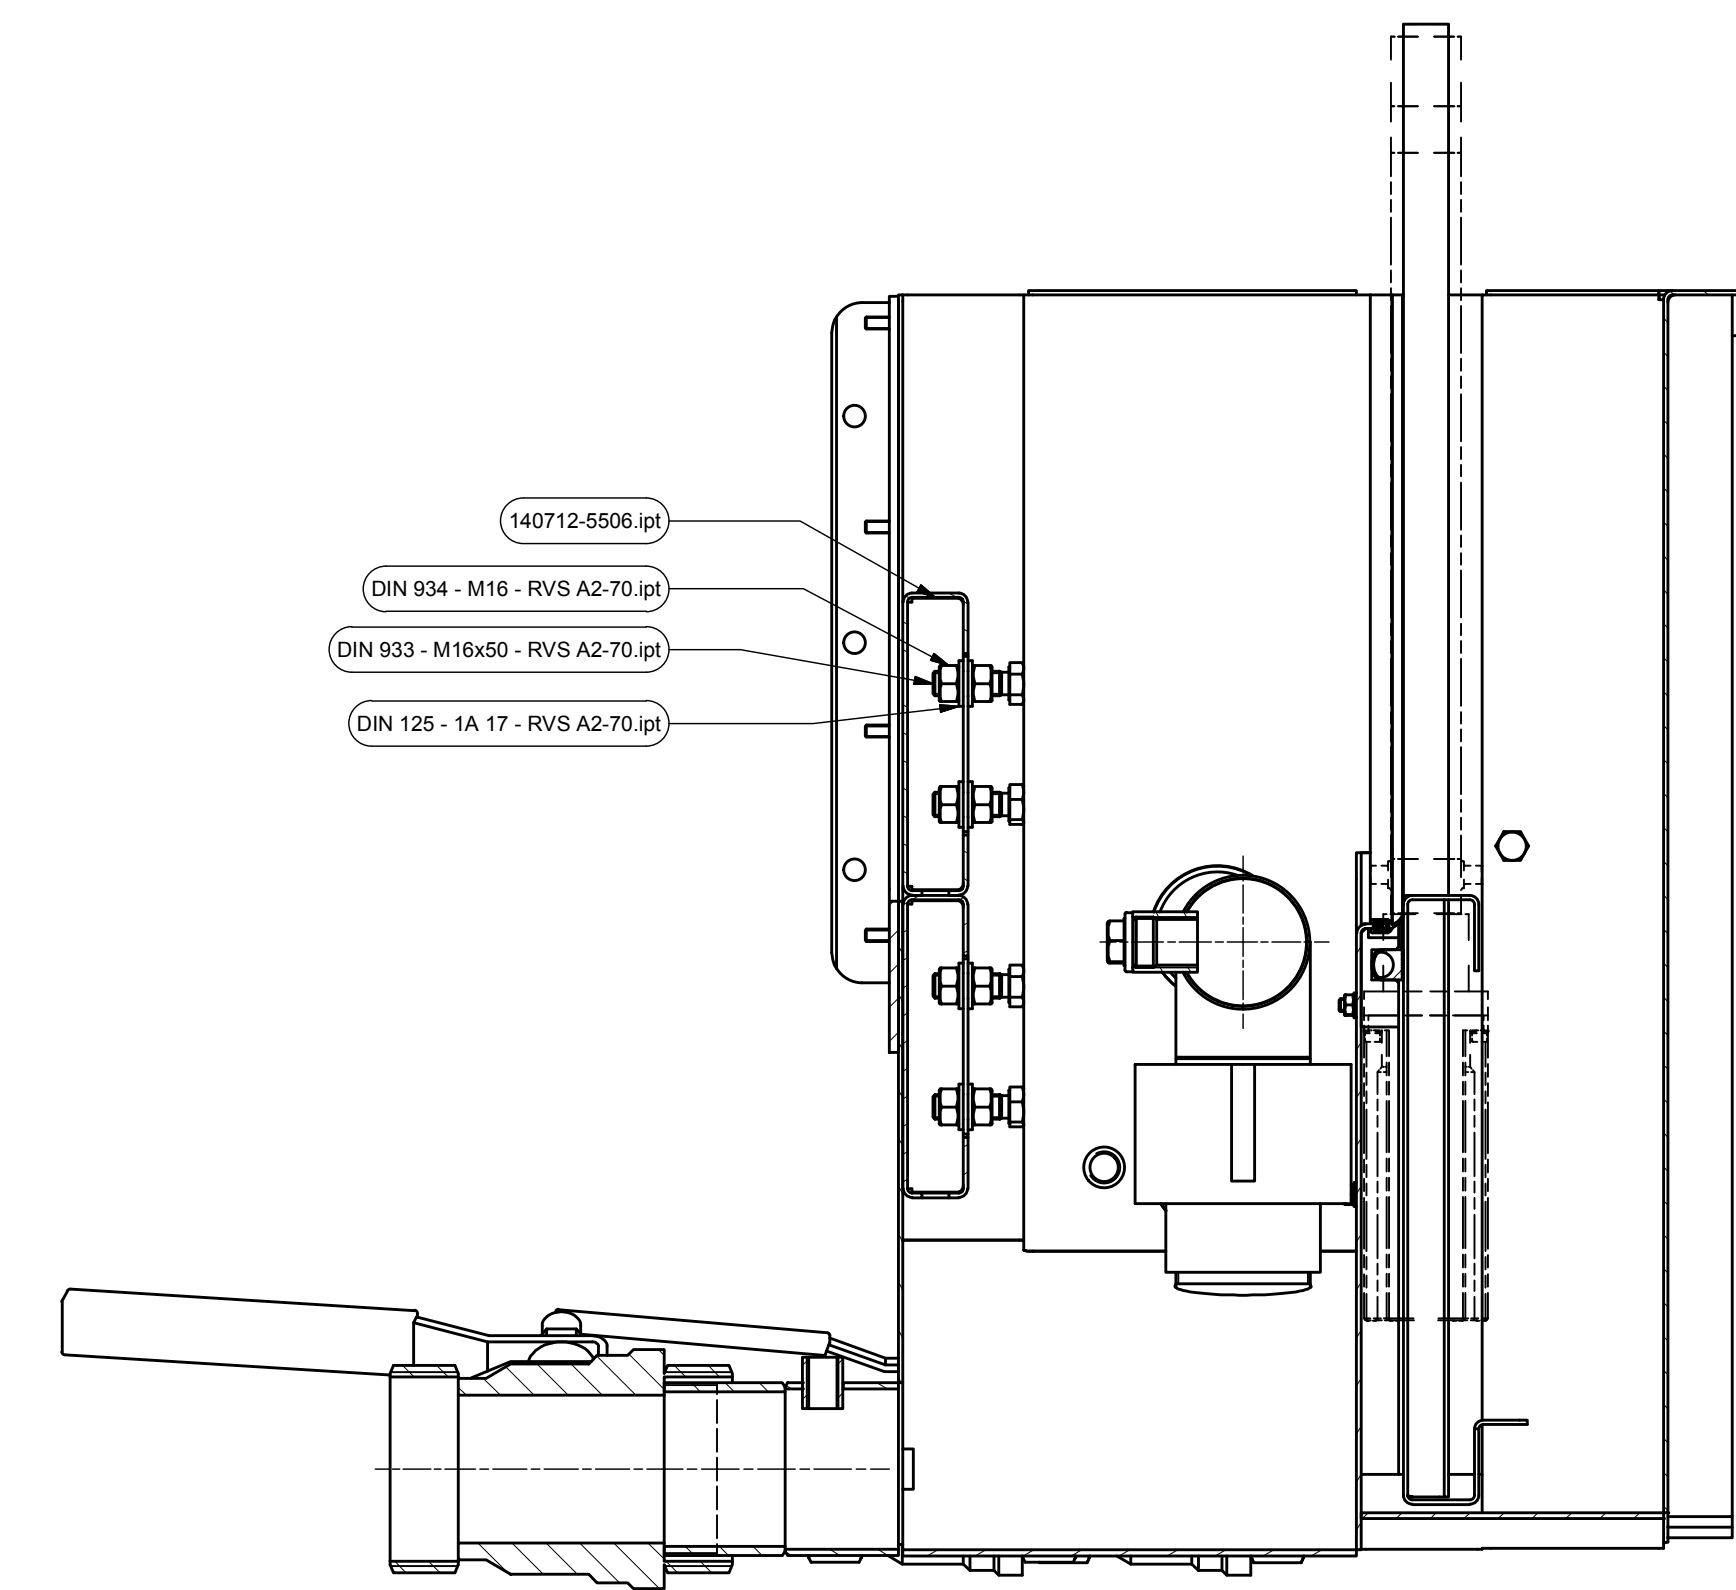

L-L ( 1 : 5 )



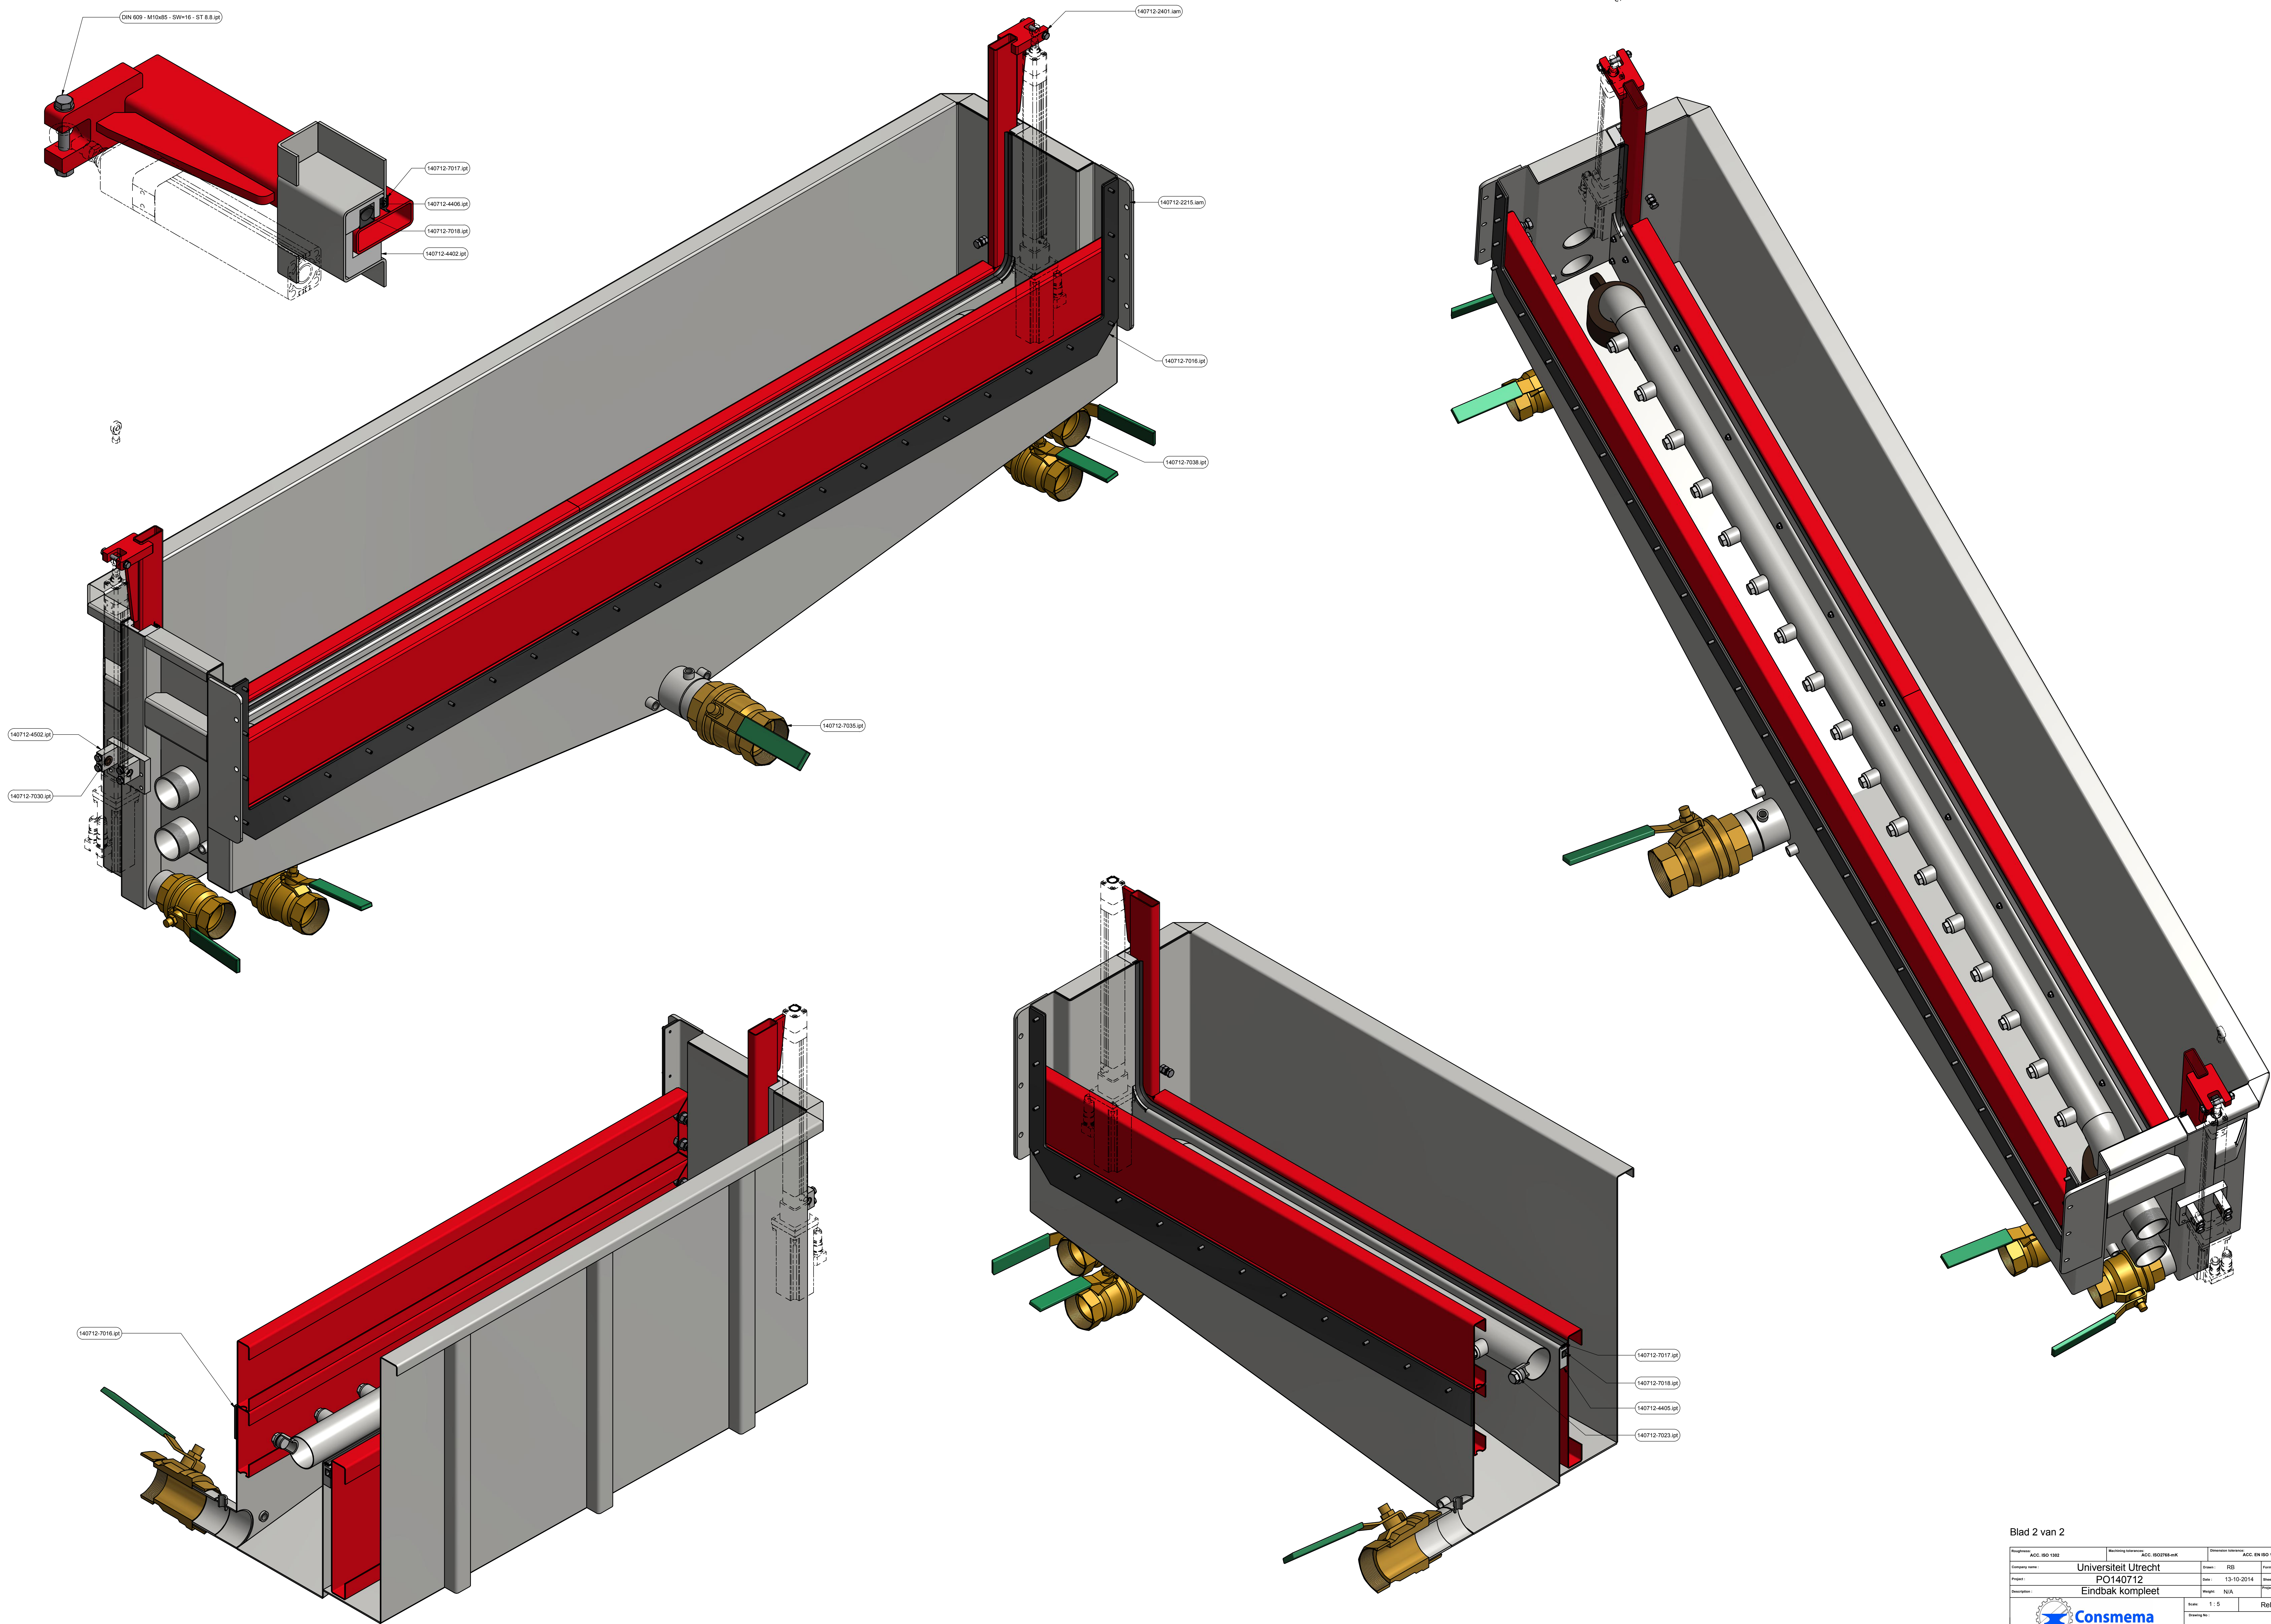

Supplement: Supplementary file 3 [file endbasin140712-2220.pdf › endbasin140712-2220.pdf]
